# Supplementary material for: The specific gravity of mesopelagic fish from the northeastern Pacific Ocean and its implications for acoustic backscatter
Source: Oxford University Press journal article supplement (doi:10.1093/icesjms/fsr140), 2011-09-02
Supplement: fsr140supp.doc [file fsr140supp.doc]

**Supplementary material: ICES Journal of Marine Science, 68**

**The specific gravity of mesopelagic fish from the northeastern Pacific Ocean and its implications for acoustic backscatter**

Peter Davison

**Figure S1**. Northeast Pacific Ocean midwater trawl locations for three cruises of the RV “New Horizon” and one of the FSV “Bell Shimada”: open triangles, CCE-P0904; open circles, SEAPLEX; open square, DSB; open diamonds, Shimada.

**Table S1**. Trawl information. The CCE-P0904, SEAPLEX, DSB, and Shimada cruises are abbreviated as “CC,” “SP,” “DSB”" and “SH,” respectively. “Depth” refers to the maximum depth of an oblique trawl profile. “IKMT” refers to an 8 m2 Isaacs–Kidd midwater trawl (Isaacs and Kidd, 1953), and “MOHT” to a 5 m2 Matsuda-Oozeki-Hu trawl (Ooze*ki et a*l., 2004).

| **Cruise:tow** | **Net type** | **Date**  **(PDT)** | **Time**  **(PDT)** | **Latitude**  **(°N)** | **Longitude**  **(°W)** | **Light conditions** | **Depth**  **(m)** |
| --- | --- | --- | --- | --- | --- | --- | --- |
| CC:1-1 | IKMT | 25 Apr 2009 | 07:39 | 34.276 | 121.775 | day | ~800* |
| CC:1-2 | IKMT | 25 Apr 2009 | 17:04 | 34.229 | 121.755 | day | 186 |
| CC:2-1 | IKMT | 27 Apr 2009 | 23:40 | 34.053 | 122.205 | night | 165 |
| CC:2-2 | IKMT | 28 Apr 2009 | 06:44 | 34.086 | 122.114 | day | 743 |
| CC:2-3 | IKMT | 28 Apr 2009 | 16:50 | 33.976 | 121.905 | day | 833 |
| CC:2-4 | IKMT | 29 Apr 2009 | 13:44 | 33.984 | 121.737 | day | 805 |
| CC:2-5 | IKMT | 29 Apr 2009 | 21:18 | 33.884 | 121.673 | night | 185 |
| CC:F-1 | IKMT | 1 May 2009 | 22:43 | 34.099 | 121.392 | night | 162 |
| CC:F-2 | IKMT | 2 May 2009 | 02:18 | 34.037 | 121.459 | night | 168 |
| CC:F-3 | IKMT | 2 May 2009 | 05:18 | 33.966 | 121.541 | night | 176 |
| SP:1-1 | MOHT | 3 Aug 2009 | 07:03 | 32.426 | 119.985 | day | ~900* |
| SP:1-2 | MOHT | 3 Aug 2009 | 14:48 | 32.414 | 119.979 | day | 910 |
| SP:1-3 | MOHT | 3 Aug 2009 | 19:59 | 32.411 | 119.992 | dusk | 835 |
| SP:1-4 | MOHT | 3 Aug 2009 | 23:46 | 32.418 | 120.079 | night | 231 |
| SP:2-1 | MOHT | 8 Aug 2009 | 16:16 | 32.064 | 137.899 | day | 918 |
| SP:2-2 | MOHT | 8 Aug 2009 | 20:57 | 32.076 | 137.940 | dusk | 824 |
| SP:2-3 | MOHT | 9 Aug 2009 | 01:51 | 32.106 | 137.904 | night | 177 |
| SP:2-4 | MOHT | 9 Aug 2009 | 05:49 | 32.069 | 137.914 | dawn | 756 |
| SP:3-1 | MOHT | 10 Aug 2009 | 17:04 | 32.915 | 140.312 | day | 878 |
| SP:3-2 | MOHT | 10 Aug 2009 | 21:21 | 32.925 | 140.303 | dusk | 797 |
| SP:3-3 | MOHT | 11 Aug 2009 | 02:27 | 32.884 | 140.265 | night | 176 |
| SP:3-4 | MOHT | 11 Aug 2009 | 06:07 | 32.883 | 140.283 | dawn | 725 |
| SP:4-1 | MOHT | 14 Aug 2009 | 00:50 | 34.063 | 139.976 | night | 888 |
| SP:4-2 | MOHT | 14 Aug 2009 | 04:57 | 34.064 | 139.976 | night | 197 |
| SP:4-3 | MOHT | 14 Aug 2009 | 07:08 | 34.069 | 139.979 | dawn | 797 |
| SP:4-4 | MOHT | 14 Aug 2009 | 18:06 | 34.058 | 139.998 | day | 837 |
| DSB:1 | IKMT | 31 Oct 2009 | 12:15 | 32.598 | 117.463 | day | 1188 |
| SH:1 | MOHT | 24 Sep 2010 | 18:05 | 32.400 | 118.457 | day | 199 |
| SH:2 | MOHT | 24 Sep 2010 | 19:27 | 32.343 | 118.557 | night | 214 |
| SH:3 | MOHT | 25 Sep 2010 | 11:55 | 31.678 | 119.908 | day | 639 |
| SH:5 | MOHT | 26 Sep 2010 | 09:28 | 31.180 | 120.919 | day | 773 |

* The time-depth recorder malfunctioned on two tows. Depth was estimated from other tows with the same profile.

**Table S2**. Species included in this study, with sample size from each cruise. The CCE-P0904, SEAPLEX, DSB, and Shimada cruises are abbreviated as “CC,” “SP,” “DSB”, and “SH,” respectively. The SEAPLEX samples are further divided into those collected from the California Current, and those from the North Pacific subtropical gyre, respectively.

| **Family** | **Species name** | **Sample size** | | | |
| --- | --- | --- | --- | --- | --- |
| **CC** | **SP** | **DSB** | **SH** |
| Microstomatidae | *Microstoma microstoma* (Risso) | 3 | 2+1 | 0 | 0 |
| Bathylagidae | *Bathylagoides wesethi* (Bolin) | 17 | 5+1 | 15 | 17 |
|  | *Leuroglossus stilbius* Gilbert | 0 | 4+0 | 2 | 0 |
|  | *Lipolagus ochotensis* (Schmidt) | 2 | 1+0 | 4 | 5 |
| Alepocephalidae | *Alepocephalus tenebrosus* Gilbert | 2 | 0 | 0 | 2 |
| Platytroctidae | *Holtbyrnia latifrons* Sazonov | 3 | 3+0 | 0 | 0 |
|  | *Sagamichthys abei* Parr | 4 | 0 | 1 | 0 |
| Gonostomatidae | *Cyclothone acclinidens* Garman | 21 | 7+4 | 12 | 0 |
|  | *Cyclothone atraria* Gilbert | 3 | 1+6 | 0 | 0 |
|  | *Cyclothone pallida* Brauer | 0 | 1+5 | 0 | 0 |
|  | *Cyclothone pseudopallida* Mukhacheva | 1 | 0+11 | 0 | 0 |
|  | *Cyclothone signata* Garman | 21 | 2+12 | 1 | 0 |
| Sternoptychidae | *Argyropelecus affinis* Garman | 5 | 1+2 | 1 | 8 |
|  | *Argyropelecus hemigymnus* Cocco | 7 | 1+5 | 0 | 4 |
|  | *Argyropelecus lychnus* Garman | 0 | 0 | 2 | 1 |
|  | *Argyropelecus sladeni* Regan | 14 | 3+0 | 2 | 7 |
|  | *Danaphos oculatus* (Garman) | 6 | 2+13 | 0 | 2 |
|  | *Sternoptyx diaphana* Hermann | 0 | 0+5 | 1 | 0 |
|  | *Sternoptyx obscura* Garman | 3 | 0 | 0 | 4 |
|  | *Sternoptyx pseudobscura* Baird | 1 | 0+6 | 0 | 1 |
| Phosichthyidae | *Ichthyococcus irregularis* Rechnitzer and Bohlke | 1 | 2+0 | 0 | 0 |
|  | *Vinciguerria nimbaria* (Jordan and Williams) | 0 | 0+9 | 0 | 0 |
|  | *Vinciguerria poweriae* (Cocco) | 0 | 0+15 | 0 | 0 |
| Stomiidae | *Chauliodus macouni* Bean | 3 | 0 | 0 | 3 |
|  | *Stomias atriventer* Garman | 0 | 3+0 | 0 | 1 |
|  | *Bathophilus flemingi* Aron and McCrery | 1 | 0+5 | 0 | 0 |
|  | *Photonectes parvimanus* Regan and Trewavas | 0 | 0+6 | 0 | 0 |
|  | *Aristostomias xenostoma* Regan and Trewavas | 0 | 0+5 | 0 | 0 |
|  | *Idiacanthus antrostomus* Gilbert | 12 | 2+4 | 1 | 2 |
|  | *Tactostoma macropus* Bolin | 4 | 0 | 0 | 0 |
| Scopelarchidae | *Scopelarchus stephensi* Johnson | 0 | 0+3 | 0 | 0 |
| Notosudidae | *Scopelosaurus harryi* (Mead) | 0 | 0 | 0 | 5 |
| Paralepididae | *Arctozenus risso* (Bonaparte) | 5 | 0 | 0 | 1 |
| Myctophidae | *Bolinichthys longipes* (Brauer) | 0 | 0+4 | 0 | 0 |
|  | *Ceratoscopelus townsendi* (Eigenmann and Eigenmann) | 11 | 1+0 | 3 | 28 |
|  | *Ceratoscopelus warmingii* (Lutken) | 0 | 0+18 | 0 | 0 |
|  | *Diaphus anderseni* Taning | 0 | 0+13 | 0 | 0 |
|  | *Diaphus fulgens* (Brauer) | 0 | 0+7 | 0 | 0 |
|  | *Diaphus theta* Eigenmann and Eigenmann | 20 | 4+0 | 1 | 7 |
|  | *Diogenichthys atlanticus* (Taning) | 5 | 3+14 | 0 | 3 |
|  | *Electrona risso* (Cocco) | 0 | 0+3 | 0 | 0 |
|  | *Hygophum proximum* Becker | 0 | 0+5 | 0 | 0 |
|  | *Hygophum reinhardtii* (Lutken) | 0 | 0+4 | 0 | 0 |
|  | *Lampadena urophaos* Paxton | 0 | 0+12 | 0 | 0 |
|  | *Lampanyctus tenuiformis* (Brauer) | 0 | 0+13 | 0 | 0 |
|  | *Lobianchia gemellarii* (Cocco) | 0 | 0+3 | 0 | 0 |
|  | *Myctophum nitidulum* Garman | 0 | 0+16 | 0 | 1 |

**Table S2**. (continued)

| **Family** | **Species name** | **Sample size** | | | |
| --- | --- | --- | --- | --- | --- |
| **CC** | **SP** | **DSB** | **SH** |
| Myctophidae | *Nannobrachium fernae* (Wisner) | 0 | 0+5 | 0 | 0 |
|  | *Nannobrachium hawaiiensis* Zahuranec | 0 | 0+20 | 0 | 2 |
|  | *Nannobrachium regale* (Gilbert) | 5 | 5+4 | 2 | 3 |
|  | *Nannobrachium ritteri* (Gilbert) | 25 | 13+1 | 5 | 12 |
|  | *Notolychnus valdiviae* (Brauer) | 0 | 0+8 | 0 | 0 |
|  | *Notoscopelus resplendens* (Richardson) | 0 | 0+5 | 0 | 0 |
|  | *Parvilux ingens* Hubbs and Wisner | 3 | 1+0 | 2 | 0 |
|  | *Protomyctophum crockeri* (Bolin) | 13 | 8+0 | 0 | 5 |
|  | *Stenobrachius leucopsarus* (Eigenmann and Eigenmann) | 31 | 11+0 | 3 | 12 |
|  | *Symbolophorus californiensis* (Eigenmann and Eigenmann) | 8 | 6+0 | 3 | 3 |
|  | *Taaningichthys bathyphilus* (Taning) | 0 | 0+3 | 0 | 0 |
|  | *Tarletonbeania crenularis* (Jordan and Gilbert) | 17 | 3+0 | 0 | 0 |
|  | *Triphoturus mexicanus* (Gilbert) | 16 | 5+0 | 25 | 6 |
|  | *Triphoturus nigrescens* (Brauer) | 0 | 0+4 | 0 | 0 |
| Ophidiidae | *Chilara taylori* (Girard) | 0 | 1+0 | 1 | 1 |
| Melamphaeidae | *Melamphaes lugubris* Gilbert | 8 | 0 | 0 | 1 |
|  | *Melamphaes parvus* Ebeling | 1 | 1+2 | 0 | 0 |
|  | *Melamphaes simus* Ebeling | 0 | 0+5 | 0 | 0 |
|  | *Melamphaes suborbitalis* (Gill) | 0 | 0+2 | 0 | 1 |
|  | *Poromitra crassiceps* (Gunther) | 5 | 6+0 | 1 | 2 |
|  | *Scopeloberyx opisthopterus* (Parr) | 0 | 0+3 | 0 | 0 |
|  | *Scopelogadus mizolepis* Gunther | 6 | 1+1 | 3 | 8 |
| Howellidae | *Bathysphyraenops simplex* Parr | 0 | 0+6 | 0 | 1 |
| Gempylidae | *Diplospinus multistriatus* Maul | 0 | 0+6 | 0 | 0 |

**Table S3**. Standard length, *L*S, wet weight, *W*W, body specific gravity after gas removal, **f, measured gas volume, and the gas volume required for neutral buoyancy, *V*G, for all individual fish. For gas volume, “P” indicates present but not measured, “R” indicates evidence of rupturing, and “-” indicates not recorded. Species are ordered after Table 1 in the main text, individuals are ordered by increasing *L*S.

| **Group** | **Family** | **Species** | ***L*S (mm)** | ***W*W (g)** | ****f** | **Gas vol. (mm3)** | **Gas vol.**  **(% total)** | ***V*G**  **(% total)** |
| --- | --- | --- | --- | --- | --- | --- | --- | --- |
| I | Myctophidae | *Tarletonbeania crenularis* | 22 | 0.11 | 1.0575 | R | - | 2.884 |
|  |  |  | 23 | 0.12 | 1.0575 | 0 | 0 | 2.884 |
|  |  |  | 24 | 0.13 | 1.0675 | R | - | 3.794 |
|  |  |  | 27 | 0.20 | 1.0875 | 0 | 0 | 5.563 |
|  |  |  | 32 | 0.37 | 1.0850 | 0 | 0 | 5.346 |
|  |  |  | 32 | 0.28 | 1.0550 | P | - | 2.654 |
|  |  |  | 33 | 0.43 | 1.0850 | P | - | 5.346 |
|  |  |  | 35 | 0.48 | 1.0875 | 5.704 | 1.276 | 5.563 |
|  |  |  | 36 | 0.46 | 1.0825 | 0 | 0 | 5.127 |
|  |  |  | 37 | 0.61 | 1.0875 | 0 | 0 | 5.563 |
|  |  |  | 37 | 0.58 | 1.0875 | 4.877 | 0.906 | 5.563 |
|  |  |  | 39 | 0.73 | 1.0825 | 4.189 | 0.617 | 5.127 |
|  |  |  | 39 | 0.67 | 1.0850 | 4.824 | 0.775 | 5.346 |
|  |  |  | 39 | 0.70 | 1.0875 | 1.317 | 0.204 | 5.563 |
|  |  |  | 39 | 0.60 | 1.0850 | 8.543 | 1.521 | 5.346 |
|  |  |  | 40 | 0.79 | 1.0850 | 5.394 | 0.735 | 5.346 |
|  |  |  | 40 | 0.77 | 1.0875 | 0 | 0 | 5.563 |
|  |  |  | 43 | 0.93 | 1.0850 | 1.219 | 0.142 | 5.346 |
|  |  |  | 45 | 1.14 | 1.0850 | 0 | 0 | 5.346 |
|  |  |  | 57 | 2.01 | 1.0850 | 0 | 0 | 5.346 |
| I | Myctophidae | *Hygophum reinhardtii* | 19 | 0.10 | 1.0700 | 1.012 | 1.071 | 4.019 |
|  |  |  | 20 | 0.09 | 1.0625 | 2.090 | 2.408 | 3.341 |
|  |  |  | 39 | 0.85 | 1.0750 | 0.085 | 0.011 | 4.465 |
|  |  |  | 43 | 1.13 | 1.0775 | 33.112 | 3.061 | 4.687 |
| I | Myctophidae | *Notoscopelus resplendens* | 27 | 0.28 | 1.0700 | 33.885 | 11.464 | 4.019 |
|  |  |  | 28 | 0.24 | 1.0750 | 0 | 0 | 4.465 |
|  |  |  | 31 | 0.38 | 1.0750 | 22.984 | 6.105 | 4.465 |
|  |  |  | 40 | 0.84 | 1.0750 | 0 | 0 | 4.465 |
|  |  |  | 42 | 0.90 | 1.0775 | 0 | 0 | 4.687 |
| I | Gempylidae | *Diplospinus multistriatus* | 18 | 0.02 | 1.0725 | 0.676 | 3.496 | 4.242 |
|  |  |  | 21 | 0.04 | 1.0675 | 1.073 | 2.784 | 3.794 |
|  |  |  | 28 | 0.05 | 1.0800 | - | - | 4.907 |
|  |  |  | 38 | 0.04 | 1.0725 | 2.146 | 5.441 | 4.242 |
|  |  |  | 49 | 0.14 | 1.0775 | 0.176 | 0.135 | 4.687 |
|  |  |  | 55 | 0.14 | 1.0700 | 2.965 | 2.216 | 4.019 |
| I | Myctophidae | *Diogenichthys atlanticus* | 16 | 0.06 | 1.0675 | 1.053 | 1.840 | 3.794 |
|  |  |  | 16 | 0.08 | 1.0575 | R | - | 2.884 |
|  |  |  | 17 | 0.06 | 1.0600 | 3.331 | 5.558 | 3.113 |
|  |  |  | 18 | 0.08 | 1.0725 | 0 | 0 | 4.242 |
|  |  |  | 18 | 0.09 | 1.0575 | 0.527 | 0.615 | 2.884 |
|  |  |  | 18 | 0.10 | 1.0575 | R | - | 2.884 |
|  |  |  | 18 | 0.09 | 1.0675 | 0.066 | 0.078 | 3.794 |
|  |  |  | 18 | 0.08 | 1.0650 | 1.553 | 2.026 | 3.568 |
|  |  |  | 19 | 0.13 | 1.0750 | 8.230 | 6.372 | 4.465 |
|  |  |  | 19 | 0.12 | 1.0550 | R | - | 2.654 |
|  |  |  | 19 | 0.12 | 1.0675 | 3.334 | 2.880 | 3.794 |
|  |  |  | 19 | 0.10 | 1.0675 | 0.456 | 0.484 | 3.794 |

**Table S3**. (continued)

| **Group** | **Family** | **Species** | ***L*S (mm)** | ***W*W (g)** | ****f** | **Gas vol. (mm3)** | **Gas vol.**  **(% total)** | ***V*G**  **(% total)** |
| --- | --- | --- | --- | --- | --- | --- | --- | --- |
| I | Myctophidae | *Diogenichthys atlanticus* | 20 | 0.14 | 1.0750 | 4.214 | 3.134 | 4.465 |
|  |  |  | 20 | 0.12 | 1.0675 | 10.845 | 8.798 | 3.794 |
|  |  |  | 20 | 0.12 | 1.0700 | 4.214 | 3.621 | 4.019 |
|  |  |  | 21 | 0.14 | 1.0750 | 0.427 | 0.327 | 4.465 |
|  |  |  | 21 | 0.14 | 1.0725 | 9.435 | 6.741 | 4.242 |
|  |  |  | 21 | 0.16 | 1.0650 | 8.906 | 5.596 | 3.568 |
|  |  |  | 22 | 0.16 | 1.0775 | 6.811 | 4.386 | 4.687 |
|  |  |  | 22 | 0.20 | 1.0700 | 0.527 | 0.281 | 4.019 |
|  |  |  | 22 | 0.17 | 1.0700 | 0.480 | 0.301 | 4.019 |
|  |  |  | 22 | 0.17 | 1.0750 | 3.224 | 1.998 | 4.465 |
|  |  |  | 22 | 0.17 | 1.0700 | 5.887 | 3.573 | 4.019 |
|  |  |  | 23 | 0.19 | 1.0800 | 2.965 | 1.658 | 4.907 |
|  |  |  | 23 | 0.19 | 1.0750 | 3.977 | 2.201 | 4.465 |
| I | Myctophidae | *Myctophum nitidulum* | 18 | 0.07 | 1.0600 | 0.020 | 0.030 | 3.113 |
|  |  |  | 21 | 0.10 | 1.0775 | 0.749 | 0.800 | 4.687 |
|  |  |  | 22 | 0.13 | 1.0725 | 1.058 | 0.866 | 4.242 |
|  |  |  | 30 | 0.29 | 1.0750 | 1.249 | 0.461 | 4.465 |
|  |  |  | 31 | 0.34 | 1.0775 | 5.926 | 1.843 | 4.687 |
|  |  |  | 31 | 0.40 | 1.0775 | 3.046 | 0.814 | 4.687 |
|  |  |  | 32 | 0.45 | 1.0700 | 6.109 | 1.432 | 4.019 |
|  |  |  | 32 | 0.37 | 1.0750 | 6.543 | 1.866 | 4.465 |
|  |  |  | 36 | 0.63 | 1.0775 | 6.672 | 1.128 | 4.687 |
|  |  |  | 37 | 0.77 | 1.0750 | 5.358 | 0.742 | 4.465 |
|  |  |  | 46 | 1.28 | 1.0725 | 59.593 | 4.756 | 4.242 |
|  |  |  | 65 | 4.10 | 1.0725 | 0 | 0 | 4.242 |
|  |  |  | 74 | 6.76 | 1.0775 | 0 | 0 | 4.687 |
|  |  |  | 76 | 6.70 | 1.0725 | P | - | 4.242 |
|  |  |  | 76 | 6.54 | 1.0725 | P | - | 4.242 |
|  |  |  | 77 | 7.02 | 1.0725 | P | - | 4.242 |
|  |  |  | 78 | 7.98 | 1.0725 | P | - | 4.242 |
| I | Myctophidae | *Electrona risso* | 11 | 0.03 | 1.0700 | R | - | 4.019 |
|  |  |  | 18 | 0.14 | 1.0725 | 0 | 0 | 4.242 |
|  |  |  | 32 | 0.89 | 1.0725 | 3.031 | 0.364 | 4.242 |
| I | Myctophidae | *Hygophum proximum* | 16 | 0.06 | 1.0700 | 0.280 | 0.498 | 4.019 |
|  |  |  | 20 | 0.11 | 1.0650 | 0 | 0 | 3.568 |
|  |  |  | 29 | 0.39 | 1.0725 | 0 | 0 | 4.242 |
|  |  |  | 29 | 0.35 | 1.0750 | 6.653 | 2.002 | 4.465 |
|  |  |  | 32 | 0.52 | 1.0725 | 0 | 0 | 4.242 |
| I | Myctophidae | *Protomyctophum crockeri* | 15 | 0.06 | 1.0750 | R | - | 4.465 |
|  |  |  | 16 | 0.06 | 1.0700 | R | - | 4.019 |
|  |  |  | 17 | 0.09 | 1.0675 | R | - | 3.794 |
|  |  |  | 17 | 0.09 | 1.0675 | 0 |  | 3.794 |
|  |  |  | 18 | 0.14 | 1.0675 | 0.156 | 0.119 | 3.794 |
|  |  |  | 19 | 0.10 | 1.0675 | R | - | 3.794 |
|  |  |  | 19 | 0.12 | 1.0725 | R | - | 4.242 |
|  |  |  | 19 | 0.16 | 1.0700 | R | - | 4.019 |
|  |  |  | 20 | 0.16 | 1.0675 | 0 | 0 | 3.794 |
|  |  |  | 23 | 0.28 | 1.0600 | 2.439 | 0.915 | 3.113 |
|  |  |  | 24 | 0.31 | 1.0700 | 4.633 | 1.574 | 4.019 |
|  |  |  | 24 | 0.26 | 1.0825 | 13.410 | 5.288 | 5.127 |
|  |  |  | 25 | 0.33 | 1.0650 | 1.249 | 0.401 | 3.568 |

**Table S3**. (continued)

| **Group** | **Family** | **Species** | ***L*S (mm)** | ***W*W (g)** | ****f** | **Gas vol. (mm3)** | **Gas vol.**  **(% total)** | ***V*G**  **(% total)** |
| --- | --- | --- | --- | --- | --- | --- | --- | --- |
| I | Myctophidae | *Protomyctophum crockeri* | 25 | 0.30 | 1.0575 | 0.305 | 0.107 | 2.884 |
|  |  |  | 26 | 0.37 | 1.0725 | 0 | 0 | 4.242 |
|  |  |  | 27 | 0.44 | 1.0675 | 0 | 0 | 3.794 |
|  |  |  | 28 | 0.46 | 1.0725 | 2.085 | 0.484 | 4.242 |
|  |  |  | 28 | 0.41 | 1.0775 | R | - | 4.687 |
|  |  |  | 30 | 0.47 | 1.0725 | 2.190 | 0.497 | 4.242 |
|  |  |  | 32 | 0.66 | 1.0725 | 45.012 | 6.816 | 4.242 |
|  |  |  | 33 | 0.74 | 1.0775 | 2.439 | 0.354 | 4.687 |
|  |  |  | 33 | 0.74 | 1.0700 | 0.836 | 0.121 | 4.019 |
|  |  |  | 35 | 0.83 | 1.0725 | 0 | 0 | 4.242 |
|  |  |  | 35 | 0.87 | 1.0750 | 14.922 | 1.810 | 4.465 |
|  |  |  | 36 | 0.84 | 1.0675 | 0 | 0 | 3.794 |
|  |  |  | 37 | 0.99 | 1.0725 | 0 | 0 | 4.242 |
| I | Myctophidae | *Nannobrachium fernae* | 32 | 0.25 | 1.0700 | 0 | 0 | 4.019 |
|  |  |  | 34 | 0.33 | 1.0775 | 18.504 | 5.698 | 4.687 |
|  |  |  | 35 | 0.35 | 1.0675 | 4.214 | 1.269 | 3.794 |
|  |  |  | 36 | 0.43 | 1.0625 | 0.020 | 0.005 | 3.341 |
|  |  |  | 63 | 2.31 | 1.0725 | 69.392 | 3.121 | 4.242 |
| I | Myctophidae | *Lampadena urophaos* | 19 | 0.08 | 1.0625 | 0.788 | 1.035 | 3.341 |
|  |  |  | 19 | 0.09 | 1.0600 | 6.692 | 7.305 | 3.113 |
|  |  |  | 20 | 0.10 | 1.0600 | 0 | 0 | 3.113 |
|  |  |  | 21 | 0.12 | 1.0600 | 0.836 | 0.733 | 3.113 |
|  |  |  | 22 | 0.13 | 1.0550 | 4.233 | 3.322 | 2.654 |
|  |  |  | 22 | 0.13 | 1.0625 | 4.214 | 3.329 | 3.341 |
|  |  |  | 22 | 0.13 | 1.0600 | 8.386 | 6.401 | 3.113 |
|  |  |  | 22 | 0.11 | 1.0600 | 7.662 | 6.876 | 3.113 |
|  |  |  | 24 | 0.16 | 1.0700 | 7.131 | 4.552 | 4.019 |
|  |  |  | 25 | 0.18 | 1.0700 | 0 | 0 | 4.019 |
|  |  |  | 26 | 0.11 | 1.0600 | 3.246 | 3.033 | 3.113 |
|  |  |  | 26 | 0.22 | 1.0775 | 5.884 | 2.801 | 4.687 |
| I | Myctophidae | *Bolinichthys longipes* | 38 | 0.75 | 1.0725 | 19.136 | 2.664 | 4.242 |
|  |  |  | 38 | 0.77 | 1.0700 | 30.812 | 4.106 | 4.019 |
|  |  |  | 41 | 0.96 | 1.0725 | 3.351 | 0.373 | 4.242 |
|  |  |  | 42 | 1.06 | 1.0675 | 44.505 | 4.290 | 3.794 |
| I | Myctophidae | *Diaphus anderseni* | 25 | 0.30 | 1.0700 | 2.595 | 0.917 | 4.019 |
|  |  |  | 26 | 0.31 | 1.0700 | 0 | 0 | 4.019 |
|  |  |  | 26 | 0.35 | 1.0625 | 8.230 | 2.438 | 3.341 |
|  |  |  | 26 | 0.37 | 1.0625 | R | - | 3.341 |
|  |  |  | 26 | 0.31 | 1.0750 | 0 | 0 | 4.465 |
|  |  |  | 27 | 0.37 | 1.0625 | 4.214 | 1.196 | 3.341 |
|  |  |  | 27 | 0.36 | 1.0725 | 3.246 | 0.958 | 4.242 |
|  |  |  | 27 | 0.36 | 1.0750 | 0.176 | 0.052 | 4.465 |
|  |  |  | 27 | 0.37 | 1.0725 | 0 | 0 | 4.242 |
|  |  |  | 28 | 0.45 | 1.0700 | R | - | 4.019 |
|  |  |  | 28 | 0.45 | 1.0675 | 7.901 | 1.840 | 3.794 |
|  |  |  | 28 | 0.36 | 1.0750 | 0 | 0 | 4.465 |
|  |  |  | 30 | 0.58 | 1.0725 | 0.836 | 0.154 | 4.242 |
| I | Myctophidae | *Ceratoscopelus warmingii* | 19 | 0.07 | 1.0700 | 0.305 | 0.464 | 4.019 |
|  |  |  | 19 | 0.08 | 1.0600 | 8.230 | 9.833 | 3.113 |
|  |  |  | 20 | 0.09 | 1.0600 | 0.305 | 0.358 | 3.113 |
|  |  |  | 20 | 0.08 | 1.0500 | 1.032 | 1.336 | 2.190 |

**Table S3.** (continued)

| **Group** | **Family** | **Species** | ***L*S (mm)** | ***W*W (g)** | ****f** | **Gas vol. (mm3)** | **Gas vol.**  **(% total)** | ***V*G**  **(% total)** |
| --- | --- | --- | --- | --- | --- | --- | --- | --- |
| I | Myctophidae | *Ceratoscopelus warmingii* | 21 | 0.09 | 1.0650 | 2.480 | 2.851 | 3.568 |
|  |  |  | 21 | 0.11 | 1.0550 | 1.929 | 1.816 | 2.654 |
|  |  |  | 22 | 0.09 | 1.0675 | 4.372 | 4.931 | 3.794 |
|  |  |  | 22 | 0.10 | 1.0600 | 1.380 | 1.442 | 3.113 |
|  |  |  | 22 | 0.11 | 1.0550 | 0.683 | 0.651 | 2.654 |
|  |  |  | 24 | 0.17 | 1.0700 | 2.743 | 1.697 | 4.019 |
|  |  |  | 26 | 0.20 | 1.0600 | 8.230 | 4.180 | 3.113 |
|  |  |  | 26 | 0.19 | 1.0625 | R | - | 3.341 |
|  |  |  | 27 | 0.23 | 1.0675 | R | - | 3.794 |
|  |  |  | 30 | 0.34 | 1.0700 | 2.439 | 0.762 | 4.019 |
|  |  |  | 32 | 0.35 | 1.0725 | 2.439 | 0.742 | 4.242 |
|  |  |  | 36 | 0.58 | 1.0725 | 33.712 | 5.868 | 4.242 |
|  |  |  | 43 | 1.18 | 1.0700 | 30.181 | 2.664 | 4.019 |
|  |  |  | 48 | 1.74 | 1.0700 | 57.613 | 3.422 | 4.019 |
| I | Phosichthyidae | *Vinciguerria nimbaria* | 17 | 0.03 | 1.0700 | 1.778 | 5.963 | 4.019 |
|  |  |  | 17 | 0.04 | 1.0700 | 2.439 | 6.124 | 4.019 |
|  |  |  | 18 | 0.04 | 1.0675 | 1.553 | 3.981 | 3.794 |
|  |  |  | 18 | 0.04 | 1.0675 | 2.080 | 5.259 | 3.794 |
|  |  |  | 19 | 0.04 | 1.0700 | 0.066 | 0.176 | 4.019 |
|  |  |  | 19 | 0.05 | 1.0625 | 3.551 | 7.016 | 3.341 |
|  |  |  | 19 | 0.06 | 1.0600 | R | - | 3.113 |
|  |  |  | 31 | 0.30 | 1.0675 | 30.181 | 9.698 | 3.794 |
|  |  |  | 32 | 0.33 | 1.0700 | 14.420 | 4.467 | 4.019 |
| I | Phosichthyidae | *Vinciguerria poweriae* | 18 | 0.03 | 1.0775 | 4.370 | 13.566 | 4.687 |
|  |  |  | 18 | 0.03 | 1.0725 | 2.504 | 8.218 | 4.242 |
|  |  |  | 18 | 0.04 | 1.0675 | 0.066 | 0.175 | 3.794 |
|  |  |  | 19 | 0.07 | 1.0600 | R | - | 3.113 |
|  |  |  | 20 | 0.08 | 1.0650 | 5.358 | 6.658 | 3.568 |
|  |  |  | 22 | 0.13 | 1.0650 | R | - | 3.568 |
|  |  |  | 25 | 0.18 | 1.0700 | 2.802 | 1.638 | 4.019 |
|  |  |  | 30 | 0.31 | 1.0700 | 1.249 | 0.429 | 4.019 |
|  |  |  | 30 | 0.33 | 1.0650 | 0.856 | 0.275 | 3.568 |
|  |  |  | 31 | 0.37 | 1.0700 | 8.296 | 2.343 | 4.019 |
|  |  |  | 32 | 0.38 | 1.0725 | 26.798 | 7.032 | 4.242 |
|  |  |  | 34 | 0.58 | 1.0675 | R | - | 3.794 |
|  |  |  | 35 | 0.51 | 1.0725 | 53.533 | 10.119 | 4.242 |
|  |  |  | 37 | 0.67 | 1.0675 | R | - | 3.794 |
|  |  |  | 38 | 0.78 | 1.0675 | 14.749 | 1.979 | 3.794 |
| I | Myctophidae | *Diaphus fulgens* | 36 | 0.69 | 1.0750 | 0.305 | 0.047 | 4.465 |
|  |  |  | 36 | 0.77 | 1.0725 | 0.371 | 0.052 | 4.242 |
|  |  |  | 38 | 0.87 | 1.0725 | 1.249 | 0.154 | 4.242 |
|  |  |  | 39 | 1.07 | 1.0725 | 2.524 | 0.252 | 4.242 |
|  |  |  | 40 | 1.04 | 1.0700 | 2.305 | 0.237 | 4.019 |
|  |  |  | 41 | 1.19 | 1.0725 | 0.156 | 0.014 | 4.242 |
|  |  |  | 52 | 2.46 | 1.0675 | 4.590 | 0.199 | 3.794 |
| I | Myctophidae | *Lampanyctus tenuiformis* | 28 | 0.17 | 1.0675 | 14.222 | 8.198 | 3.794 |
|  |  |  | 30 | 0.21 | 1.0700 | 1.778 | 0.898 | 4.019 |
|  |  |  | 30 | 0.27 | 1.0625 | 0 | 0 | 3.341 |
|  |  |  | 35 | 0.36 | 1.0600 | 27.698 | 7.541 | 3.113 |
|  |  |  | 37 | 0.49 | 1.0600 | 0.020 | 0.004 | 3.113 |
|  |  |  | 38 | 0.44 | 1.0725 | 30.337 | 6.885 | 4.242 |

Table S3. (continued)

| **Group** | **Family** | **Species** | ***L*S (mm)** | ***W*W (g)** | ****f** | **Gas vol. (mm3)** | **Gas vol.**  **(% total)** | ***V*G**  **(% total)** |
| --- | --- | --- | --- | --- | --- | --- | --- | --- |
| I | Myctophidae | *Lampanyctus tenuiformis* | 38 | 0.49 | 1.0725 | 6.492 | 1.401 | 4.242 |
|  |  |  | 39 | 0.54 | 1.0625 | - | - | 3.341 |
|  |  |  | 40 | 0.48 | 1.0700 | 4.494 | 0.992 | 4.019 |
|  |  |  | 42 | 0.74 | 1.0700 | 75.693 | 9.865 | 4.019 |
|  |  |  | 43 | 0.79 | 1.0675 | 1.249 | 0.168 | 3.794 |
|  |  |  | 43 | 0.81 | 1.0675 | 45.327 | 5.637 | 3.794 |
|  |  |  | 43 | 0.79 | 1.0700 | 0 | 0 | 4.019 |
| I | Microstomatidae | *Microstoma microstoma* | 20 | 0.05 | 1.0575 | 0.305 | 0.641 | 2.884 |
|  |  |  | 20 | 0.04 | 1.0700 | R | - | 4.019 |
|  |  |  | 20 | 0.05 | 1.0675 | R | - | 3.794 |
|  |  |  | 28 | 0.17 | 1.0700 | 0.527 | 0.330 | 4.019 |
|  |  |  | 31 | 0.16 | 1.0700 | 2.014 | 1.329 | 4.019 |
|  |  |  | 55 | 0.90 | 1.0675 | 0 | 0 | 3.794 |
| I | Sternoptychidae | *Danaphos oculatus* | 22 | 0.08 | 1.0575 | R | - | 2.884 |
|  |  |  | 22 | 0.06 | 1.0600 | R | - | 3.113 |
|  |  |  | 23 | 0.10 | 1.0650 | R | - | 3.568 |
|  |  |  | 23 | 0.08 | 1.0600 | R | - | 3.113 |
|  |  |  | 23 | 0.05 | 1.0600 | R | - | 3.113 |
|  |  |  | 24 | 0.08 | 1.0625 | R | - | 3.341 |
|  |  |  | 25 | 0.10 | 1.0600 | R | - | 3.113 |
|  |  |  | 25 | 0.09 | 1.0650 | R | - | 3.568 |
|  |  |  | 26 | 0.12 | 1.0600 | R | - | 3.113 |
|  |  |  | 28 | 0.18 | 1.0625 | R | - | 3.341 |
|  |  |  | 30 | 0.21 | 1.0625 | R | - | 3.341 |
|  |  |  | 31 | 0.22 | 1.0575 | R | - | 2.884 |
|  |  |  | 33 | 0.23 | 1.0675 | R | - | 3.794 |
|  |  |  | 34 | 0.33 | 1.0625 | 2.370 | 0.757 | 3.341 |
|  |  |  | 34 | 0.33 | 1.0625 | R | - | 3.341 |
|  |  |  | 35 | 0.36 | 1.0625 | 1.778 | 0.522 | 3.341 |
|  |  |  | 36 | 0.40 | 1.0675 | 1.778 | 0.472 | 3.794 |
|  |  |  | 36 | 0.33 | 1.0750 | 21.967 | 6.678 | 4.465 |
|  |  |  | 36 | 0.40 | 1.0650 | R | - | 3.568 |
|  |  |  | 36 | 0.33 | 1.0650 | R | - | 3.568 |
|  |  |  | 38 | 0.50 | 1.0600 | 15.188 | 3.119 | 3.113 |
|  |  |  | 41 | 0.53 | 1.0675 | 0.305 | 0.061 | 3.794 |
|  |  |  | 41 | 0.52 | 1.0675 | R | - | 3.794 |
| I | Myctophidae | *Symbolophorus californiensis* | 25 | 0.14 | 1.0650 | 1.731 | 1.300 | 3.568 |
|  |  |  | 29 | 0.22 | 1.0675 | 14.420 | 6.539 | 3.794 |
|  |  |  | 30 | 0.26 | 1.0675 | 6.692 | 2.674 | 3.794 |
|  |  |  | 31 | 0.32 | 1.0725 | 0.593 | 0.198 | 4.242 |
|  |  |  | 35 | 0.40 | 1.0725 | 0 | 0 | 4.242 |
|  |  |  | 42 | 0.81 | 1.0725 | 0.766 | 0.101 | 4.242 |
|  |  |  | 42 | 0.84 | 1.0750 | 0 | 0 | 4.465 |
|  |  |  | 43 | 0.83 | 1.0750 | 0 | 0 | 4.465 |
|  |  |  | 45 | 0.99 | 1.0800 | 14.817 | 1.591 | 4.907 |
|  |  |  | 61 | 2.29 | 1.0725 | 0.085 | 0.004 | 4.242 |
|  |  |  | 64 | 2.78 | 1.0675 | 32.263 | 1.224 | 3.794 |
|  |  |  | 68 | 3.71 | 1.0725 | 11.220 | 0.323 | 4.242 |
|  |  |  | 70 | 4.05 | 1.0675 | 0 | 0 | 3.794 |
|  |  |  | 72 | 4.21 | 1.0625 | P | - | 3.341 |
|  |  |  | 73 | 4.54 | 1.0575 | P | - | 2.884 |

**Table S3**. (continued)

| **Group** | **Family** | **Species** | ***L*S (mm)** | ***W*W (g)** | ****f** | **Gas vol. (mm3)** | **Gas vol.**  **(% total)** | ***V*G**  **(% total)** |
| --- | --- | --- | --- | --- | --- | --- | --- | --- |
| I | Myctophidae | *Symbolophorus californiensis* | 74 | 5.33 | 1.0650 | 0 | 0 | 3.568 |
|  |  |  | 75 | 5.46 | 1.0525 | 24.867 | 0.477 | 2.423 |
|  |  |  | 78 | 6.37 | 1.0575 | P | - | 2.884 |
|  |  |  | 86 | 6.79 | 1.0725 | 8.230 | 0.130 | 4.242 |
|  |  |  | 88 | 7.24 | 1.0675 | P | - | 3.794 |
| I | Ophidiidae | *Chilara taylori* | 35 | 0.05 | 1.0600 | 0.305 | 0.642 | 3.113 |
|  |  |  | 54 | 0.22 | 1.0675 | 0 | 0 | 3.794 |
|  |  |  | 55 | 0.25 | 1.0600 | 8.586 | 3.513 | 3.113 |
| I | Myctophidae | *Taaningichthys bathyphilus* | 42 | 0.75 | 1.0575 | 27.937 | 3.790 | 2.884 |
|  |  |  | 43 | 0.65 | 1.0625 | 71.679 | 10.488 | 3.341 |
|  |  |  | 66 | 2.89 | 1.0625 | 106.913 | 3.782 | 3.341 |
| I | Sternoptychidae | *Argyropelecus lychnus* | 13 | 0.06 | 1.0675 | 9.262 | 14.147 | 3.794 |
|  |  |  | 36 | 1.71 | 1.0625 | P | - | 3.341 |
|  |  |  | 37 | 1.84 | 1.0625 | P | - | 3.341 |
| I | Sternoptychidae | *Argyropelecus sladeni* | 12 | 0.06 | 1.0675 | 10.750 | 16.055 | 3.794 |
|  |  |  | 14 | 0.07 | 1.0625 | 16.095 | 19.634 | 3.341 |
|  |  |  | 15 | 0.11 | 1.0650 | R | - | 3.568 |
|  |  |  | 15 | 0.10 | 1.0525 | 12.869 | 11.929 | 2.423 |
|  |  |  | 15 | 0.12 | 1.0575 | 5.421 | 4.560 | 2.884 |
|  |  |  | 16 | 0.14 | 1.0675 | 17.095 | 11.532 | 3.794 |
|  |  |  | 17 | 0.16 | 1.0675 | 20.816 | 12.195 | 3.794 |
|  |  |  | 18 | 0.20 | 1.0725 | 6.236 | 3.236 | 4.242 |
|  |  |  | 18 | 0.18 | 1.0725 | 8.482 | 4.811 | 4.242 |
|  |  |  | 20 | 0.23 | 1.0525 | 10.611 | 4.631 | 2.423 |
|  |  |  | 21 | 0.24 | 1.0525 | 31.817 | 12.245 | 2.423 |
|  |  |  | 23 | 0.34 | 1.0500 | 32.002 | 8.994 | 2.190 |
|  |  |  | 24 | 0.42 | 1.0675 | 31.017 | 7.307 | 3.794 |
|  |  |  | 25 | 0.47 | 1.0525 | P | - | 2.423 |
|  |  |  | 25 | 0.44 | 1.0650 | 55.440 | 11.831 | 3.568 |
|  |  |  | 27 | 0.62 | 1.0700 | 48.366 | 7.704 | 4.019 |
|  |  |  | 28 | 0.71 | 1.0550 | 103.145 | 13.290 | 2.654 |
|  |  |  | 29 | 0.74 | 1.0650 | 201.376 | 22.470 | 3.568 |
|  |  |  | 32 | 0.94 | 1.0425 | 255.488 | 22.079 | 1.487 |
|  |  |  | 32 | 0.97 | 1.0725 | P | - | 4.242 |
|  |  |  | 33 | 1.07 | 1.0675 | 150.072 | 13.022 | 3.794 |
|  |  |  | 34 | 1.03 | 1.0700 | P | - | 4.019 |
|  |  |  | 35 | 1.21 | 1.0625 | 165.837 | 12.711 | 3.341 |
|  |  |  | 35 | 1.26 | 1.0725 | P | - | 4.242 |
|  |  |  | 41 | 2.06 | 1.0675 | 107.300 | 5.267 | 3.794 |
|  |  |  | 41 | 1.99 | 1.0600 | 200.273 | 9.640 | 3.113 |
| I | Sternoptychidae | *Argyropelecus hemigymnus* | 15 | 0.07 | 1.0625 | R | - | 3.341 |
|  |  |  | 15 | 0.09 | 1.0675 | 6.692 | 7.353 | 3.794 |
|  |  |  | 16 | 0.09 | 1.0725 | 11.476 | 12.031 | 4.242 |
|  |  |  | 17 | 0.14 | 1.0650 | 12.096 | 8.426 | 3.568 |
|  |  |  | 18 | 0.14 | 1.0625 | 11.981 | 8.335 | 3.341 |
|  |  |  | 18 | 0.15 | 1.0600 | 28.881 | 16.950 | 3.113 |
|  |  |  | 19 | 0.14 | 1.0575 | 40.889 | 23.597 | 2.884 |
|  |  |  | 20 | 0.19 | 1.0600 | R | - | 3.113 |
|  |  |  | 21 | 0.25 | 1.0675 | P | - | 3.794 |
|  |  |  | 21 | 0.22 | 1.0675 | 9.223 | 4.284 | 3.794 |
|  |  |  | 22 | 0.28 | 1.0625 | 81.056 | 23.523 | 3.341 |

Table S3. (continued)

| **Group** | **Family** | **Species** | ***L*S (mm)** | ***W*W (g)** | ****f** | **Gas vol. (mm3)** | **Gas vol.**  **(% total)** | ***V*G**  **(% total)** |
| --- | --- | --- | --- | --- | --- | --- | --- | --- |
| I | Sternoptychidae | *Argyropelecus hemigymnus* | 25 | 0.37 | 1.0625 | 3.836 | 1.090 | 3.341 |
|  |  |  | 27 | 0.53 | 1.0625 | P | - | 3.341 |
|  |  |  | 27 | 0.46 | 1.0650 | 43.461 | 9.142 | 3.568 |
|  |  |  | 29 | 0.61 | 1.0625 | P | - | 3.341 |
|  |  |  | 29 | 0.69 | 1.0625 | P | - | 3.341 |
|  |  |  | 30 | 0.72 | 1.0575 | P | - | 2.884 |
| I | Sternoptychidae | *Argyropelecus affinis* | 14 | 0.06 | 1.0575 | 1.858 | 3.171 | 2.884 |
|  |  |  | 15 | 0.06 | 1.0575 | 14.517 | 20.374 | 2.884 |
|  |  |  | 17 | 0.10 | 1.0675 | P | - | 3.794 |
|  |  |  | 17 | 0.09 | 1.0600 | 3.275 | 3.714 | 3.113 |
|  |  |  | 20 | 0.14 | 1.0400 | 32.151 | 19.279 | 1.250 |
|  |  |  | 21 | 0.21 | 1.0550 | 62.578 | 23.918 | 2.654 |
|  |  |  | 28 | 0.42 | 1.0575 | 38.104 | 8.754 | 2.884 |
|  |  |  | 33 | 0.71 | 1.0475 | P | - | 1.957 |
|  |  |  | 44 | 2.17 | 1.0525 | 406.136 | 16.457 | 2.423 |
|  |  |  | 45 | 2.02 | 1.0525 | 100.289 | 4.966 | 2.423 |
|  |  |  | 47 | 2.38 | 1.0575 | 302.070 | 11.834 | 2.884 |
|  |  |  | 49 | 2.53 | 1.0488 | 230.732 | 8.730 | 2.074 |
|  |  |  | 49 | 2.79 | 1.0575 | 666.969 | 20.179 | 2.884 |
|  |  |  | 55 | 3.22 | 1.0575 | 439.482 | 12.613 | 2.884 |
|  |  |  | 65 | 5.82 | 1.0625 | P | - | 3.341 |
|  |  |  | 66 | 6.43 | 1.0575 | 780.365 | 11.374 | 2.884 |
|  |  |  | 76 | 10.70 | 1.0575 | 780.365 | 7.160 | 2.884 |
| I | Howellidae | *Bathysphyraenops simplex* | 17 | 0.06 | 1.0750 | 0.156 | 0.279 | 4.465 |
|  |  |  | 19 | 0.09 | 1.0750 | 0 | 0 | 4.465 |
|  |  |  | 19 | 0.07 | 1.0675 | 1.314 | 1.965 | 3.794 |
|  |  |  | 20 | 0.09 | 1.0750 | 0.695 | 0.823 | 4.465 |
|  |  |  | 20 | 0.08 | 1.0750 | 1.314 | 1.736 | 4.465 |
|  |  |  | 20 | 0.08 | 1.0800 | 0.156 | 0.210 | 4.907 |
|  |  |  | 47 | 1.82 | 1.0575 | 0.914 | 0.053 | 2.884 |
| I | Gonostomatidae | *Cyclothone pseudopallida* | 18 | 0.01 | 1.0600 | R | - | 3.113 |
|  |  |  | 24 | 0.06 | 1.0575 | 1.434 | 2.465 | 2.884 |
|  |  |  | 28 | 0.07 | 1.0500 | R | - | 2.190 |
|  |  |  | 29 | 0.10 | 1.0525 | 0.156 | 0.164 | 2.423 |
|  |  |  | 33 | 0.15 | 1.0575 | 4.146 | 2.840 | 2.884 |
|  |  |  | 38 | 0.18 | 1.0575 | 9.328 | 5.195 | 2.884 |
|  |  |  | 39 | 0.22 | 1.0575 | 8.126 | 3.759 | 2.884 |
|  |  |  | 41 | 0.23 | 1.0550 | 4.280 | 1.925 | 2.654 |
|  |  |  | 42 | 0.26 | 1.0550 | 1.975 | 0.795 | 2.654 |
|  |  |  | 42 | 0.25 | 1.0525 | 1.778 | 0.743 | 2.423 |
|  |  |  | 42 | 0.26 | 1.0550 | 2.439 | 0.980 | 2.654 |
|  |  |  | 43 | 0.21 | 1.0600 | R | - | 3.113 |
| I | Melamphaeidae | *Melamphaes simus* | 15 | 0.07 | 1.0725 | 0.856 | 1.294 | 4.242 |
|  |  |  | 15 | 0.06 | 1.0700 | R | - | 4.019 |
|  |  |  | 16 | 0.08 | 1.0675 | - | - | 3.794 |
|  |  |  | 16 | 0.05 | 1.0650 | R | - | 3.568 |
|  |  |  | 29 | 0.56 | 1.0550 | R | - | 2.654 |
| I | Sternoptychidae | *Sternoptyx obscura* | 12 | 0.11 | 1.0525 | R | - | 2.423 |
|  |  |  | 27 | 0.93 | 1.0525 | 48.419 | 5.195 | 2.423 |
|  |  |  | 27 | 0.83 | 1.0525 | 114.311 | 12.660 | 2.423 |
|  |  |  | 28 | 0.86 | 1.0575 | 65.243 | 7.427 | 2.884 |

**Table S3. (continued)**

| **Group** | **Family** | **Species** | ***L*S (mm)** | ***W*W (g)** | ****f** | **Gas vol. (mm3)** | **Gas vol.**  **(% total)** | ***V*G**  **(% total)** |
| --- | --- | --- | --- | --- | --- | --- | --- | --- |
| I | Sternoptychidae | *Sternoptyx obscura* | 30 | 1.14 | 1.0525 | 153.330 | 12.401 | 2.423 |
|  |  |  | 31 | 1.57 | 1.0575 | 181.069 | 10.870 | 2.884 |
|  |  |  | 41 | 3.37 | 1.0525 | R | - | 2.423 |
| I | Sternoptychidae | *Sternoptyx diaphana* | 14 | 0.17 | 1.0525 | 6.653 | 3.956 | 2.423 |
|  |  |  | 19 | 0.45 | 1.0550 | 180.435 | 29.727 | 2.654 |
|  |  |  | 23 | 0.75 | 1.0500 | 83.287 | 10.443 | 2.190 |
|  |  |  | 25 | 1.00 | 1.0525 | 6.692 | 0.699 | 2.423 |
|  |  |  | 32 | 2.35 | 1.0488 | P | - | 2.074 |
|  |  |  | 35 | 1.90 | 1.0575 | 585.496 | 24.578 | 2.884 |
| I | Gonostomatidae | *Cyclothone signata* | 15 | 0.02 | 1.0575 | 0.702 | 3.581 | 2.884 |
|  |  |  | 16 | 0.02 | 1.0575 | 1.075 | 5.380 | 2.884 |
|  |  |  | 18 | 0.02 | 1.0525 | 0.966 | 4.836 | 2.423 |
|  |  |  | 18 | 0.04 | 1.0600 | 1.314 | 3.366 | 3.113 |
|  |  |  | 19 | 0.03 | 1.0575 | 0.836 | 2.864 | 2.884 |
|  |  |  | 20 | 0.03 | 1.0575 | R | - | 2.884 |
|  |  |  | 20 | 0.03 | 1.0625 | R | - | 3.341 |
|  |  |  | 20 | 0.03 | 1.0650 | 0 | 0 | 3.568 |
|  |  |  | 20 | 0.02 | 1.0750 | R | - | 4.465 |
|  |  |  | 21 | 0.05 | 1.0550 | R | - | 2.654 |
|  |  |  | 22 | 0.05 | 1.0625 | 4.390 | 8.532 | 3.341 |
|  |  |  | 22 | 0.04 | 1.0775 | 1.717 | 4.420 | 4.687 |
|  |  |  | 24 | 0.05 | 1.0500 | 3.160 | 6.224 | 2.190 |
|  |  |  | 24 | 0.04 | 1.0475 | 3.541 | 8.486 | 1.957 |
|  |  |  | 24 | 0.06 | 1.0575 | 1.434 | 2.465 | 2.884 |
|  |  |  | 25 | 0.08 | 1.0525 | 1.873 | 2.405 | 2.423 |
|  |  |  | 25 | 0.09 | 1.0550 | 5.609 | 6.169 | 2.654 |
|  |  |  | 26 | 0.08 | 1.0525 | R | - | 2.423 |
|  |  |  | 26 | 0.09 | 1.0525 | 1.873 | 2.143 | 2.423 |
|  |  |  | 28 | 0.11 | 1.0500 | 6.321 | 5.690 | 2.190 |
|  |  |  | 29 | 0.12 | 1.0500 | 2.963 | 2.527 | 2.190 |
|  |  |  | 30 | 0.09 | 1.0575 | R | - | 2.884 |
|  |  |  | 30 | 0.13 | 1.0475 | 1.405 | 1.119 | 1.957 |
|  |  |  | 30 | 0.10 | 1.0575 | 1.561 | 1.624 | 2.884 |
|  |  |  | 31 | 0.15 | 1.0475 | 10.993 | 7.130 | 1.957 |
|  |  |  | 32 | 0.13 | 1.0500 | 3.170 | 2.497 | 2.190 |
|  |  |  | 32 | 0.16 | 1.0475 | 15.802 | 9.376 | 1.957 |
|  |  |  | 32 | 0.17 | 1.0500 | 0.305 | 0.188 | 2.190 |
|  |  |  | 32 | 0.13 | 1.0600 | 9.876 | 7.453 | 3.113 |
|  |  |  | 32 | 0.15 | 1.0550 | 1.314 | 0.916 | 2.654 |
|  |  |  | 33 | 0.12 | 1.0600 | R | - | 3.113 |
|  |  |  | 33 | 0.13 | 1.0575 | 9.328 | 7.053 | 2.884 |
|  |  |  | 34 | 0.16 | 1.0500 | 14.800 | 8.853 | 2.190 |
|  |  |  | 35 | 0.20 | 1.0575 | R | - | 2.884 |
|  |  |  | 35 | 0.19 | 1.0550 | 2.439 | 1.336 | 2.654 |
|  |  |  | 35 | 0.13 | 1.0600 | R | - | 3.113 |
| I | Sternoptychidae | *Sternoptyx pseudobscura* | 17 | 0.23 | 1.0475 | 2.439 | 1.098 | 1.957 |
|  |  |  | 19 | 0.45 | 1.0500 | 4.280 | 0.989 | 2.190 |
|  |  |  | 20 | 0.51 | 1.0475 | 0 | 0 | 1.957 |
|  |  |  | 31 | 2.05 | 1.0575 | P | - | 2.884 |
|  |  |  | 33 | 2.35 | 1.0575 | 554.979 | 19.983 | 2.884 |
|  |  |  | 41 | 3.73 | 1.0475 | R | - | 1.957 |

**Table S3**. (continued)

| **Group** | **Family** | **Species** | ***L*S (mm)** | ***W*W (g)** | ****f** | **Gas vol. (mm3)** | **Gas vol.**  **(% total)** | ***V*G**  **(% total)** |
| --- | --- | --- | --- | --- | --- | --- | --- | --- |
| I | Sternoptychidae | *Sternoptyx pseudobscura* | 42 | 4.72 | 1.0475 | R | - | 1.957 |
|  |  |  | 44 | 4.45 | 1.0525 | 1245.536 | 22.755 | 2.423 |
| I | Myctophidae | *Diaphus theta* | 14 | 0.04 | 1.0625 | 0.305 | 0.803 | 3.341 |
|  |  |  | 15 | 0.05 | 1.0525 | 0.344 | 0.719 | 2.423 |
|  |  |  | 15 | 0.05 | 1.0675 | 0.851 | 1.785 | 3.794 |
|  |  |  | 17 | 0.07 | 1.0650 | 2.241 | 3.297 | 3.568 |
|  |  |  | 17 | 0.08 | 1.0675 | 1.695 | 2.212 | 3.794 |
|  |  |  | 18 | 0.08 | 1.0625 | 1.141 | 1.493 | 3.341 |
|  |  |  | 24 | 0.25 | 1.0650 | 0.066 | 0.028 | 3.568 |
|  |  |  | 28 | 0.46 | 1.0650 | 0.524 | 0.121 | 3.568 |
|  |  |  | 28 | 0.37 | 1.0625 | 38.104 | 9.863 | 3.341 |
|  |  |  | 30 | 0.50 | 1.0650 | 0 | 0 | 3.568 |
|  |  |  | 31 | 0.51 | 1.0675 | 0.305 | 0.064 | 3.794 |
|  |  |  | 32 | 0.71 | 1.0525 | 0 | 0 | 2.423 |
|  |  |  | 33 | 0.58 | 1.0675 | 30.883 | 5.378 | 3.794 |
|  |  |  | 34 | 0.64 | 1.0625 | 0 | 0 | 3.341 |
|  |  |  | 35 | 0.86 | 1.0525 | 0 | 0 | 2.423 |
|  |  |  | 35 | 0.86 | 1.0575 | 7.492 | 0.913 | 2.884 |
|  |  |  | 38 | 1.05 | 1.0475 | 0 | 0 | 1.957 |
|  |  |  | 38 | 1.05 | 1.0525 | 0 | 0 | 2.423 |
|  |  |  | 38 | 1.01 | 1.0525 | 0 | 0 | 2.423 |
|  |  |  | 40 | 1.12 | 1.0575 | 0 | 0 | 2.884 |
|  |  |  | 41 | 1.17 | 1.0525 | 12.166 | 1.083 | 2.423 |
|  |  |  | 45 | 1.66 | 1.0600 | 42.318 | 2.631 | 3.113 |
|  |  |  | 45 | 1.61 | 1.0650 | 0 | 0 | 3.568 |
|  |  |  | 47 | 1.75 | 1.0475 | P | - | 1.957 |
|  |  |  | 48 | 1.98 | 1.0675 | R | - | 3.794 |
|  |  |  | 54 | 2.96 | 1.0625 | 0 | 0 | 3.341 |
|  |  |  | 54 | 2.58 | 1.0675 | 0 | 0 | 3.794 |
|  |  |  | 54 | 2.69 | 1.0450 | P | - | 1.722 |
|  |  |  | 55 | 2.95 | 1.0375 | 0 | 0 | 1.012 |
|  |  |  | 55 | 2.99 | 1.0500 | R | - | 2.190 |
|  |  |  | 65 | 5.35 | 1.0475 | P | - | 1.957 |
|  |  |  | 73 | 7.03 | 1.0500 | 1.249 | 0.019 | 2.190 |
| I | Myctophidae | *Triphoturus nigrescens* | 32 | 0.22 | 1.0700 | 1.778 | 0.857 | 4.019 |
|  |  |  | 33 | 0.27 | 1.0625 | R | - | 3.341 |
|  |  |  | 33 | 0.24 | 1.0600 | 18.368 | 7.504 | 3.113 |
|  |  |  | 41 | 0.61 | 1.0425 | 24.638 | 4.040 | 1.487 |
| I | Melamphaeidae | *Scopeloberyx opisthopterus* | 22 | 0.19 | 1.0525 | 0.066 | 0.036 | 2.423 |
|  |  |  | 30 | 0.46 | 1.0450 | 4.877 | 1.096 | 1.722 |
|  |  |  | 33 | 0.60 | 1.0375 | 0.324 | 0.056 | 1.012 |
| I | Myctophidae | *Notolychnus valdiviae* | 13 | 0.02 | 1.0575 | 0 | 0 | 2.884 |
|  |  |  | 19 | 0.06 | 1.0400 | 0.305 | 0.526 | 1.250 |
|  |  |  | 22 | 0.11 | 1.0375 | 0 | 0 | 1.012 |
|  |  |  | 22 | 0.09 | 1.0400 | 0.461 | 0.530 | 1.250 |
|  |  |  | 22 | 0.11 | 1.0400 | 0.222 | 0.209 | 1.250 |
|  |  |  | 22 | 0.10 | 1.0425 | 0.324 | 0.337 | 1.487 |
|  |  |  | 24 | 0.13 | 1.0375 | 0 | 0 | 1.012 |
|  |  |  | 25 | 0.14 | 1.0450 | R | - | 1.722 |
| I | Melamphaeidae | *Melamphaes suborbitalis* | 24 | 0.19 | 1.0600 | 8.162 | 4.355 | 3.113 |
|  |  |  | 25 | 0.26 | 1.0775 | 14.222 | 5.566 | 4.687 |

**Table S3**. (continued)

| **Group** | **Family** | **Species** | ***L*S (mm)** | ***W*W (g)** | ****f** | **Gas vol. (mm3)** | **Gas vol.**  **(% total)** | ***V*G**  **(% total)** |
| --- | --- | --- | --- | --- | --- | --- | --- | --- |
| I | Melamphaeidae | *Melamphaes suborbitalis* | 68 | 6.10 | 1.0400 | P | - | 1.250 |
| I | Phosichthyidae | *Ichthyococcus irregularis* | 24 | 0.37 | 1.0500 | 6.692 | 1.864 | 2.190 |
|  |  |  | 29 | 0.63 | 1.0450 | 74.274 | 10.969 | 1.722 |
|  |  |  | 36 | 1.09 | 1.0375 | 25.967 | 2.412 | 1.012 |
| II | Melamphaeidae | *Melamphaes parvus* | 21 | 0.23 | 1.0700 | R | - | 4.019 |
|  |  |  | 26 | 0.43 | 1.0650 | R | - | 3.568 |
|  |  |  | 29 | 0.44 | 1.0775 | 19.136 | 4.476 | 4.687 |
|  |  |  | 45 | 2.11 | 1.0550 | 0 | 0 | 2.654 |
| II | Gonostomatidae | *Cyclothone atraria* | 21 | 0.06 | 1.0550 | 0 | 0 | 2.654 |
|  |  |  | 24 | 0.06 | 1.0525 | 1.075 | 1.852 | 2.423 |
|  |  |  | 26 | 0.08 | 1.0575 | 2.439 | 3.123 | 2.884 |
|  |  |  | 28 | 0.14 | 1.0425 | 0 | 0 | 1.487 |
|  |  |  | 30 | 0.15 | 1.0550 | 0 | 0 | 2.654 |
|  |  |  | 32 | 0.12 | 1.0500 | 0 | 0 | 2.190 |
|  |  |  | 32 | 0.15 | 1.0450 | 0 | 0 | 1.722 |
|  |  |  | 41 | 0.30 | 1.0500 | 0 | 0 | 2.190 |
|  |  |  | 45 | 0.45 | 1.0550 | 0 | 0 | 2.654 |
|  |  |  | 47 | 0.47 | 1.0400 | 0 | 0 | 1.250 |
| II | Myctophidae | *Nannobrachium hawaiiensis* | 24 | 0.11 | 1.0600 | 0.527 | 0.505 | 3.113 |
|  |  |  | 26 | 0.13 | 1.0525 | 0.390 | 0.315 | 2.423 |
|  |  |  | 46 | 0.71 | 1.0525 | 1.249 | 0.185 | 2.423 |
|  |  |  | 47 | 0.77 | 1.0575 | 0.288 | 0.040 | 2.884 |
|  |  |  | 47 | 0.82 | 1.0475 | 0 | 0 | 1.957 |
|  |  |  | 51 | 0.97 | 1.0525 | 1.778 | 0.193 | 2.423 |
|  |  |  | 52 | 1.59 | 1.0575 | 0.856 | 0.057 | 2.884 |
|  |  |  | 53 | 1.03 | 1.0500 | 0.836 | 0.085 | 2.190 |
|  |  |  | 59 | 1.85 | 1.0525 | 2.751 | 0.156 | 2.423 |
|  |  |  | 60 | 1.72 | 1.0425 | 0.749 | 0.045 | 1.487 |
|  |  |  | 61 | 1.80 | 1.0525 | 3.026 | 0.177 | 2.423 |
|  |  |  | 62 | 1.93 | 1.0550 | 11.476 | 0.623 | 2.654 |
|  |  |  | 62 | 1.83 | 1.0475 | 1.778 | 0.102 | 1.957 |
|  |  |  | 63 | 2.04 | 1.0475 | 1.358 | 0.070 | 1.957 |
|  |  |  | 63 | 1.85 | 1.0525 | 3.843 | 0.218 | 2.423 |
|  |  |  | 64 | 1.76 | 1.0550 | 3.773 | 0.226 | 2.654 |
|  |  |  | 65 | 2.33 | 1.0475 | 4.302 | 0.193 | 1.957 |
|  |  |  | 68 | 2.69 | 1.0500 | 0 | 0 | 2.190 |
|  |  |  | 69 | 2.60 | 1.0525 | 1.829 | 0.074 | 2.423 |
|  |  |  | 75 | 2.73 | 1.0500 | 0 | 0 | 2.190 |
|  |  |  | 78 | 3.50 | 1.0450 | 0 | 0 | 1.722 |
|  |  |  | 92 | 5.63 | 1.0475 | 0 | 0 | 1.957 |
| II | Myctophidae | *Ceratoscopelus townsendi* | 21 | 0.11 | 1.0550 | 0.305 | 0.292 | 2.654 |
|  |  |  | 21 | 0.10 | 1.0550 | 0.176 | 0.185 | 2.654 |
|  |  |  | 21 | 0.11 | 1.0650 | 2.743 | 2.587 | 3.568 |
|  |  |  | 22 | 0.11 | 1.0575 | 0.390 | 0.374 | 2.884 |
|  |  |  | 23 | 0.13 | 1.0625 | 0.629 | 0.512 | 3.341 |
|  |  |  | 23 | 0.14 | 1.0625 | 5.267 | 3.844 | 3.341 |
|  |  |  | 23 | 0.14 | 1.0650 | 0.856 | 0.647 | 3.568 |
|  |  |  | 23 | 0.14 | 1.0625 | 1.249 | 0.939 | 3.341 |
|  |  |  | 23 | 0.14 | 1.0650 | 0.836 | 0.632 | 3.568 |
|  |  |  | 26 | 0.21 | 1.0650 | 9.659 | 4.670 | 3.568 |
|  |  |  | 27 | 0.23 | 1.0700 | 5.463 | 2.478 | 4.019 |

**Table S3**. (continued)

| **Group** | **Family** | **Species** | ***L*S (mm)** | ***W*W (g)** | ****f** | **Gas vol. (mm3)** | **Gas vol.**  **(% total)** | ***V*G**  **(% total)** |
| --- | --- | --- | --- | --- | --- | --- | --- | --- |
| II | Myctophidae | *Ceratoscopelus townsendi* | 27 | 0.25 | 1.0650 | 10.313 | 4.208 | 3.568 |
|  |  |  | 28 | 0.21 | 1.0825 | 15.822 | 7.541 | 5.127 |
|  |  |  | 28 | 0.25 | 1.0650 | 10.891 | 4.434 | 3.568 |
|  |  |  | 30 | 0.31 | 1.0750 | 13.808 | 4.569 | 4.465 |
|  |  |  | 31 | 0.36 | 1.0650 | 19.185 | 5.371 | 3.568 |
|  |  |  | 32 | 0.40 | 1.0675 | 0.020 | 0.005 | 3.794 |
|  |  |  | 32 | 0.40 | 1.0700 | 32.631 | 8.028 | 4.019 |
|  |  |  | 33 | 0.46 | 1.0625 | 17.975 | 3.986 | 3.341 |
|  |  |  | 37 | 0.62 | 1.0700 | 29.276 | 4.809 | 4.019 |
|  |  |  | 37 | 0.65 | 1.0675 | 0 | 0 | 3.794 |
|  |  |  | 39 | 0.91 | 1.0575 | 12.232 | 1.402 | 2.884 |
|  |  |  | 39 | 0.89 | 1.0575 | 0 | 0 | 2.884 |
|  |  |  | 40 | 0.82 | 1.0600 | 0 | 0 | 3.113 |
|  |  |  | 42 | 1.14 | 1.0625 | 0 | 0 | 3.341 |
|  |  |  | 42 | 1.08 | 1.0575 | 0 | 0 | 2.884 |
|  |  |  | 42 | 1.10 | 1.0525 | 0 | 0 | 2.423 |
|  |  |  | 45 | 1.32 | 1.0550 | 0 | 0 | 2.654 |
|  |  |  | 46 | 1.45 | 1.0375 | 0 | 0 | 1.012 |
|  |  |  | 46 | 1.46 | 1.0600 | 0 | 0 | 3.113 |
|  |  |  | 50 | 2.08 | 1.0425 | 0 | 0 | 1.487 |
|  |  |  | 50 | 1.85 | 1.0475 | 0 | 0 | 1.957 |
|  |  |  | 50 | 1.90 | 1.0500 | 0 | 0 | 2.190 |
|  |  |  | 51 | 2.21 | 1.0375 | 0 | 0 | 1.012 |
|  |  |  | 52 | 2.02 | 1.0575 | 0 | 0 | 2.884 |
|  |  |  | 52 | 1.73 | 1.0525 | 0 | 0 | 2.423 |
|  |  |  | 53 | 2.38 | 1.0375 | 0 | 0 | 1.012 |
|  |  |  | 53 | 2.47 | 1.0425 | 0 | 0 | 1.487 |
|  |  |  | 53 | 2.22 | 1.0475 | 0 | 0 | 1.957 |
|  |  |  | 54 | 2.34 | 1.0375 | 0 | 0 | 1.012 |
|  |  |  | 54 | 2.33 | 1.0475 | 0 | 0 | 1.957 |
|  |  |  | 57 | 2.57 | 1.0475 | 0 | 0 | 1.957 |
|  |  |  | 60 | 2.83 | 1.0425 | 0 | 0 | 1.487 |
| II | Melamphaeidae | *Scopelogadus mizolepis* | 25 | 0.27 | 1.0525 | 0 | 0 | 2.423 |
|  |  |  | 29 | 0.33 | 1.0575 | 0.066 | 0.021 | 2.884 |
|  |  |  | 39 | 0.79 | 1.0575 | 1.553 | 0.208 | 2.884 |
|  |  |  | 40 | 1.11 | 1.0525 | 0 | 0 | 2.423 |
|  |  |  | 40 | 1.10 | 1.0575 | 0.836 | 0.080 | 2.884 |
|  |  |  | 42 | 1.26 | 1.0550 | 0 | 0 | 2.654 |
|  |  |  | 42 | 1.42 | 1.0525 | 0 | 0 | 2.423 |
|  |  |  | 48 | 2.03 | 1.0525 | 2.746 | 0.142 | 2.423 |
|  |  |  | 55 | 3.30 | 1.0525 | 0 | 0 | 2.423 |
|  |  |  | 58 | 3.55 | 1.0500 | 0 | 0 | 2.190 |
|  |  |  | 60 | 3.92 | 1.0450 | 0 | 0 | 1.722 |
|  |  |  | 61 | 4.72 | 1.0475 | 0 | 0 | 1.957 |
|  |  |  | 61 | 4.32 | 1.0500 | 0 | 0 | 2.190 |
|  |  |  | 62 | 4.02 | 1.0525 | 0 | 0 | 2.423 |
|  |  |  | 63 | 5.54 | 1.0475 | 0 | 0 | 1.957 |
|  |  |  | 68 | 6.66 | 1.0475 | 0 | 0 | 1.957 |
|  |  |  | 69 | 6.40 | 1.0425 | 0 | 0 | 1.487 |
|  |  |  | 74 | 9.28 | 1.0475 | 0 | 0 | 1.957 |
|  |  |  | 83 | 12.96 | 1.0375 | 0 | 0 | 1.012 |

**Table S3**. (continued)

| **Group** | **Family** | **Species** | ***L*S (mm)** | ***W*W (g)** | ****f** | **Gas vol. (mm3)** | **Gas vol.**  **(% total)** | ***V*G**  **(% total)** |
| --- | --- | --- | --- | --- | --- | --- | --- | --- |
| II | Melamphaeidae | *Poromitra crassiceps* | 20 | 0.09 | 1.0550 | 6.982 | 7.565 | 2.654 |
|  |  |  | 25 | 0.16 | 1.0625 | R | - | 3.341 |
|  |  |  | 26 | 0.19 | 1.0450 | 0 | 0 | 1.722 |
|  |  |  | 27 | 0.20 | 1.0550 | 17.253 | 8.342 | 2.654 |
|  |  |  | 28 | 0.26 | 1.0575 | 0.610 | 0.247 | 2.884 |
|  |  |  | 28 | 0.26 | 1.0475 | 0.195 | 0.079 | 1.957 |
|  |  |  | 33 | 0.50 | 1.0525 | 2.653 | 0.555 | 2.423 |
|  |  |  | 33 | 0.48 | 1.0450 | 0.288 | 0.063 | 1.722 |
|  |  |  | 34 | 0.65 | 1.0475 | 22.889 | 3.557 | 1.957 |
|  |  |  | 39 | 0.84 | 1.0525 | 0.371 | 0.046 | 2.423 |
|  |  |  | 42 | 1.22 | 1.0425 | 2.129 | 0.182 | 1.487 |
|  |  |  | 49 | 2.28 | 1.0475 | P | - | 1.957 |
|  |  |  | 51 | 2.56 | 1.0425 | 0.222 | 0.009 | 1.487 |
|  |  |  | 60 | 4.01 | 1.0425 | 0.256 | 0.007 | 1.487 |
| II | Myctophidae | *Nannobrachium ritteri* | 19 | 0.06 | 1.0500 | 0 | 0 | 2.190 |
|  |  |  | 25 | 0.11 | 1.0525 | 0 | 0 | 2.423 |
|  |  |  | 25 | 0.12 | 1.0525 | 0.527 | 0.460 | 2.423 |
|  |  |  | 28 | 0.14 | 1.0450 | 0.836 | 0.620 | 1.722 |
|  |  |  | 28 | 0.17 | 1.0475 | 1.249 | 0.763 | 1.957 |
|  |  |  | 28 | 0.14 | 1.0575 | 1.717 | 1.280 | 2.884 |
|  |  |  | 29 | 0.17 | 1.0500 | 1.195 | 0.733 | 2.190 |
|  |  |  | 30 | 0.21 | 1.0500 | 2.439 | 1.205 | 2.190 |
|  |  |  | 32 | 0.26 | 1.0475 | 0.020 | 0.008 | 1.957 |
|  |  |  | 32 | 0.26 | 1.0500 | 1.434 | 0.576 | 2.190 |
|  |  |  | 33 | 0.29 | 1.0475 | 0 | 0 | 1.957 |
|  |  |  | 33 | 0.26 | 1.0525 | 0 | 0 | 2.423 |
|  |  |  | 34 | 0.31 | 1.0425 | 0.683 | 0.229 | 1.487 |
|  |  |  | 34 | 0.46 | 1.0425 | 0 | 0 | 1.487 |
|  |  |  | 34 | 0.31 | 1.0425 | 0 | 0 | 1.487 |
|  |  |  | 35 | 0.31 | 1.0525 | 0 | 0 | 2.423 |
|  |  |  | 35 | 0.30 | 1.0500 | 3.182 | 1.102 | 2.190 |
|  |  |  | 36 | 0.38 | 1.0450 | 0 | 0 | 1.722 |
|  |  |  | 36 | 0.33 | 1.0450 | 3.312 | 1.038 | 1.722 |
|  |  |  | 36 | 0.36 | 1.0475 | 1.668 | 0.483 | 1.957 |
|  |  |  | 36 | 0.35 | 1.0475 | 2.695 | 0.800 | 1.957 |
|  |  |  | 37 | 0.40 | 1.0450 | 2.765 | 0.717 | 1.722 |
|  |  |  | 37 | 0.37 | 1.0450 | 0 | 0 | 1.722 |
|  |  |  | 37 | 0.41 | 1.0425 | 0.222 | 0.056 | 1.487 |
|  |  |  | 39 | 0.46 | 1.0425 | 0.832 | 0.188 | 1.487 |
|  |  |  | 39 | 0.49 | 1.0400 | 3.358 | 0.708 | 1.250 |
|  |  |  | 40 | 0.64 | 1.0400 | 0 | 0 | 1.250 |
|  |  |  | 40 | 0.54 | 1.0425 | 0 | 0 | 1.487 |
|  |  |  | 41 | 0.57 | 1.0425 | 0 | 0 | 1.487 |
|  |  |  | 43 | 0.68 | 1.0375 | 0 | 0 | 1.012 |
|  |  |  | 44 | 0.68 | 1.0425 | 2.836 | 0.433 | 1.487 |
|  |  |  | 45 | 0.76 | 1.0425 | 0 | 0 | 1.487 |
|  |  |  | 45 | 0.79 | 1.0425 | 0.156 | 0.021 | 1.487 |
|  |  |  | 45 | 0.69 | 1.0375 | 0 | 0 | 1.012 |
|  |  |  | 45 | 0.82 | 1.0375 | 0 | 0 | 1.012 |
|  |  |  | 48 | 0.98 | 1.0375 | 0 | 0 | 1.012 |
|  |  |  | 49 | 0.92 | 1.0375 | 0 | 0 | 1.012 |

Table S3. (continued)

| **Group** | **Family** | **Species** | ***L*S (mm)** | ***W*W (g)** | ****f** | **Gas vol. (mm3)** | **Gas vol.**  **(% total)** | ***V*G**  **(% total)** |
| --- | --- | --- | --- | --- | --- | --- | --- | --- |
| II | Myctophidae | *Nannobrachium ritteri* | 49 | 1.11 | 1.0375 | 0 | 0 | 1.012 |
|  |  |  | 49 | 1.12 | 1.0375 | 0 | 0 | 1.012 |
|  |  |  | 49 | 1.09 | 1.0375 | 0 | 0 | 1.012 |
|  |  |  | 51 | 1.38 | 1.0375 | 0 | 0 | 1.012 |
|  |  |  | 51 | 1.32 | 1.0325 | 0 | 0 | 0.533 |
|  |  |  | 55 | 1.56 | 1.0350 | 0 | 0 | 0.773 |
|  |  |  | 58 | 1.79 | 1.0375 | 0 | 0 | 1.012 |
|  |  |  | 59 | 1.90 | 1.0325 | 0 | 0 | 0.533 |
|  |  |  | 77 | 4.66 | 1.0285 | 0 | 0 | 0.146 |
|  |  |  | 78 | 4.82 | 1.0300 | 0 | 0 | 0.291 |
|  |  |  | 82 | 4.79 | 1.0325 | 0 | 0 | 0.533 |
|  |  |  | 85 | 5.91 | 1.0363 | 0 | 0 | 0.893 |
|  |  |  | 85 | 6.50 | 1.0325 | 0 | 0 | 0.533 |
|  |  |  | 90 | 8.30 | 1.0325 | 0 | 0 | 0.533 |
|  |  |  | 91 | 7.50 | 1.0285 | 0 | 0 | 0.146 |
|  |  |  | 93 | 8.36 | 1.0313 | 0 | 0 | 0.412 |
|  |  |  | 93 | 8.48 | 1.0285 | 0 | 0 | 0.146 |
|  |  |  | 94 | 8.68 | 1.0325 | 0 | 0 | 0.533 |
|  |  |  | 94 | 8.10 | 1.0338 | 0 | 0 | 0.653 |
| II | Myctophidae | *Triphoturus mexicanus* | 17 | 0.04 | 1.0475 | 1.141 | 2.902 | 1.957 |
|  |  |  | 18 | 0.03 | 1.0425 | 1.778 | 5.818 | 1.487 |
|  |  |  | 19 | 0.05 | 1.0425 | 0 | 0 | 1.487 |
|  |  |  | 19 | 0.06 | 1.0475 | 0 | 0 | 1.957 |
|  |  |  | 20 | 0.05 | 1.0525 | 3.246 | 6.396 | 2.423 |
|  |  |  | 20 | 0.06 | 1.0475 | R | - | 1.957 |
|  |  |  | 21 | 0.05 | 1.0450 | 3.246 | 6.353 | 1.722 |
|  |  |  | 21 | 0.05 | 1.0475 | 0.156 | 0.326 | 1.957 |
|  |  |  | 22 | 0.07 | 1.0550 | 2.439 | 3.545 | 2.654 |
|  |  |  | 22 | 0.04 | 1.0425 | 2.497 | 6.111 | 1.487 |
|  |  |  | 26 | 0.12 | 1.0450 | 0 | 0 | 1.722 |
|  |  |  | 27 | 0.13 | 1.0525 | 1.434 | 1.148 | 2.423 |
|  |  |  | 27 | 0.12 | 1.0550 | 0.390 | 0.342 | 2.654 |
|  |  |  | 27 | 0.14 | 1.0425 | 0.066 | 0.049 | 1.487 |
|  |  |  | 29 | 0.18 | 1.0450 | 0.324 | 0.188 | 1.722 |
|  |  |  | 30 | 0.19 | 1.0425 | 1.141 | 0.622 | 1.487 |
|  |  |  | 31 | 0.22 | 1.0425 | 0 | 0 | 1.487 |
|  |  |  | 32 | 0.26 | 1.0375 | 0 | 0 | 1.012 |
|  |  |  | 32 | 0.26 | 1.0400 | 0.312 | 0.125 | 1.250 |
|  |  |  | 32 | 0.25 | 1.0450 | 0.324 | 0.135 | 1.722 |
|  |  |  | 33 | 0.28 | 1.0375 | 0 | 0 | 1.012 |
|  |  |  | 33 | 0.30 | 1.0375 | 1.210 | 0.417 | 1.012 |
|  |  |  | 34 | 0.30 | 1.0375 | 0.461 | 0.159 | 1.012 |
|  |  |  | 34 | 0.24 | 1.0425 | 0.549 | 0.238 | 1.487 |
|  |  |  | 34 | 0.25 | 1.0400 | 0 | 0 | 1.250 |
|  |  |  | 34 | 0.29 | 1.0375 | 0 | 0 | 1.012 |
|  |  |  | 35 | 0.35 | 1.0325 | 0 | 0 | 0.533 |
|  |  |  | 36 | 0.42 | 1.0375 | 0 | 0 | 1.012 |
|  |  |  | 36 | 0.35 | 1.0325 | 0 | 0 | 0.533 |
|  |  |  | 36 | 0.38 | 1.0375 | 0 | 0 | 1.012 |
|  |  |  | 36 | 0.41 | 1.0350 | 0 | 0 | 0.773 |
|  |  |  | 38 | 0.41 | 1.0350 | 0 | 0 | 0.773 |

**Table S3**. (continued)

| **Group** | **Family** | **Species** | ***L*S (mm)** | ***W*W (g)** | ****f** | **Gas vol. (mm3)** | **Gas vol.**  **(% total)** | ***V*G**  **(% total)** |
| --- | --- | --- | --- | --- | --- | --- | --- | --- |
| II | Myctophidae | *Triphoturus mexicanus* | 39 | 0.43 | 1.0325 | 0 | 0 | 0.533 |
|  |  |  | 40 | 0.56 | 1.0325 | 0 | 0 | 0.533 |
|  |  |  | 46 | 0.79 | 1.0325 | 0 | 0 | 0.533 |
|  |  |  | 48 | 0.94 | 1.0325 | 0 | 0 | 0.533 |
|  |  |  | 50 | 1.10 | 1.0325 | 0 | 0 | 0.533 |
|  |  |  | 51 | 1.15 | 1.0325 | 0 | 0 | 0.533 |
|  |  |  | 51 | 1.01 | 1.0325 | 0 | 0 | 0.533 |
|  |  |  | 52 | 1.23 | 1.0300 | 0 | 0 | 0.291 |
|  |  |  | 52 | 1.20 | 1.0338 | 0 | 0 | 0.653 |
|  |  |  | 52 | 1.20 | 1.0285 | 0 | 0 | 0.146 |
|  |  |  | 55 | 1.58 | 1.0285 | 0 | 0 | 0.146 |
|  |  |  | 56 | 1.70 | 1.0325 | 0 | 0 | 0.533 |
|  |  |  | 58 | 1.95 | 1.0338 | 0 | 0 | 0.653 |
|  |  |  | 58 | 1.92 | 1.0325 | 0 | 0 | 0.533 |
|  |  |  | 59 | 1.79 | 1.0325 | 0 | 0 | 0.533 |
|  |  |  | 59 | 1.47 | 1.0325 | 0 | 0 | 0.533 |
|  |  |  | 64 | 2.09 | 1.0300 | 0 | 0 | 0.291 |
|  |  |  | 66 | 2.55 | 1.0325 | 0 | 0 | 0.533 |
|  |  |  | 66 | 2.12 | 1.0285 | 0 | 0 | 0.146 |
|  |  |  | 68 | 2.82 | 1.0325 | 0 | 0 | 0.533 |
| II | Myctophidae | *Stenobrachius leucopsarus* | 20 | 0.07 | 1.0475 | 0.480 | 0.714 | 1.957 |
|  |  |  | 21 | 0.07 | 1.0500 | 0.344 | 0.513 | 2.190 |
|  |  |  | 21 | 0.09 | 1.0500 | 0 | 0 | 2.190 |
|  |  |  | 22 | 0.08 | 1.0575 | 1.931 | 2.490 | 2.884 |
|  |  |  | 22 | 0.10 | 1.0500 | 1.180 | 1.224 | 2.190 |
|  |  |  | 25 | 0.17 | 1.0425 | 1.053 | 0.642 | 1.487 |
|  |  |  | 25 | 0.13 | 1.0450 | 7.928 | 5.991 | 1.722 |
|  |  |  | 26 | 0.16 | 1.0450 | 0.156 | 0.102 | 1.722 |
|  |  |  | 26 | 0.20 | 1.0350 | 0.324 | 0.168 | 0.773 |
|  |  |  | 26 | 0.17 | 1.0375 | 8.230 | 4.783 | 1.012 |
|  |  |  | 27 | 0.18 | 1.0375 | 6.692 | 3.714 | 1.012 |
|  |  |  | 27 | 0.17 | 1.0375 | 19.509 | 10.640 | 1.012 |
|  |  |  | 28 | 0.22 | 1.0375 | 2.439 | 1.137 | 1.012 |
|  |  |  | 29 | 0.21 | 1.0375 | 67.777 | 25.085 | 1.012 |
|  |  |  | 30 | 0.27 | 1.0375 | 0.039 | 0.015 | 1.012 |
|  |  |  | 31 | 0.32 | 1.0375 | 3.121 | 1.002 | 1.012 |
|  |  |  | 31 | 0.33 | 1.0325 | 2.056 | 0.639 | 0.533 |
|  |  |  | 31 | 0.28 | 1.0325 | 2.261 | 0.827 | 0.533 |
|  |  |  | 32 | 0.30 | 1.0350 | 0.527 | 0.181 | 0.773 |
|  |  |  | 32 | 0.34 | 1.0350 | 0 | 0 | 0.773 |
|  |  |  | 32 | 0.34 | 1.0375 | 0 | 0 | 1.012 |
|  |  |  | 33 | 0.47 | 1.0325 | 0 | 0 | 0.533 |
|  |  |  | 33 | 0.42 | 1.0325 | 0 | 0 | 0.533 |
|  |  |  | 34 | 0.35 | 1.0325 | 0 | 0 | 0.533 |
|  |  |  | 34 | 0.39 | 1.0375 | 0 | 0 | 1.012 |
|  |  |  | 34 | 0.38 | 1.0375 | 0.176 | 0.048 | 1.012 |
|  |  |  | 34 | 0.43 | 1.0375 | 16.458 | 3.819 | 1.012 |
|  |  |  | 35 | 0.48 | 1.0325 | 0 | 0 | 0.533 |
|  |  |  | 35 | 0.45 | 1.0325 | 0 | 0 | 0.533 |
|  |  |  | 35 | 0.52 | 1.0350 | 0 | 0 | 0.773 |
|  |  |  | 36 | 0.49 | 1.0350 | 0.832 | 0.175 | 0.773 |

**Table S3**. (continued)

| **Group** | **Family** | **Species** | ***L*S (mm)** | ***W*W (g)** | ****f** | **Gas vol. (mm3)** | **Gas vol.**  **(% total)** | ***V*G**  **(% total)** |
| --- | --- | --- | --- | --- | --- | --- | --- | --- |
| II | Myctophidae | *Stenobrachius leucopsarus* | 37 | 0.57 | 1.0325 | 0 | 0 | 0.533 |
|  |  |  | 37 | 0.48 | 1.0285 | 0.156 | 0.033 | 0.146 |
|  |  |  | 37 | 0.53 | 1.0325 | 0 | 0 | 0.533 |
|  |  |  | 38 | 0.54 | 1.0325 | 0 | 0 | 0.533 |
|  |  |  | 39 | 0.63 | 1.0325 | 0 | 0 | 0.533 |
|  |  |  | 40 | 0.62 | 1.0285 | 0 | 0 | 0.146 |
|  |  |  | 42 | 0.83 | 1.0325 | 0 | 0 | 0.533 |
|  |  |  | 42 | 0.82 | 1.0325 | 0 | 0 | 0.533 |
|  |  |  | 44 | 0.94 | 1.0285 | 0 | 0 | 0.146 |
|  |  |  | 47 | 1.07 | 1.0270 | 0 | 0 | 0.000 |
|  |  |  | 52 | 1.78 | 1.0285 | 0 | 0 | 0.146 |
|  |  |  | 53 | 1.66 | 1.0270 | 0 | 0 | 0.000 |
|  |  |  | 54 | 1.62 | 1.0285 | 0 | 0 | 0.146 |
|  |  |  | 57 | 2.15 | 1.0270 | 0 | 0 | 0.000 |
|  |  |  | 60 | 2.28 | 1.0270 | 0 | 0 | 0.000 |
|  |  |  | 60 | 2.67 | 1.0285 | 0 | 0 | 0.146 |
|  |  |  | 61 | 2.65 | 1.0270 | 0 | 0 | 0.000 |
|  |  |  | 62 | 2.77 | 1.0270 | 0 | 0 | 0.000 |
|  |  |  | 63 | 3.10 | 1.0285 | 0 | 0 | 0.146 |
|  |  |  | 67 | 4.02 | 1.0285 | 0 | 0 | 0.146 |
|  |  |  | 67 | 3.63 | 1.0285 | 0 | 0 | 0.146 |
|  |  |  | 72 | 4.23 | 1.0285 | 0 | 0 | 0.146 |
|  |  |  | 75 | 5.36 | 1.0313 | 0 | 0 | 0.412 |
|  |  |  | 76 | 4.56 | 1.0325 | 0 | 0 | 0.533 |
|  |  |  | 76 | 4.91 | 1.0280 | 0 | 0 | 0.097 |
|  |  |  | 83 | 6.65 | 1.0280 | 0 | 0 | 0.097 |
| II | Myctophidae | *Nannobrachium regale* | 23 | 0.10 | 1.0525 | 14.222 | 13.020 | 2.423 |
|  |  |  | 26 | 0.14 | 1.0575 | 3.246 | 2.393 | 2.884 |
|  |  |  | 29 | 0.16 | 1.0550 | 8.733 | 5.445 | 2.654 |
|  |  |  | 33 | 0.20 | 1.0650 | 1.429 | 0.755 | 3.568 |
|  |  |  | 39 | 0.51 | 1.0625 | 0 | 0 | 3.341 |
|  |  |  | 43 | 0.55 | 1.0550 | 1.775 | 0.339 | 2.654 |
|  |  |  | 46 | 0.71 | 1.0525 | 0.198 | 0.029 | 2.423 |
|  |  |  | 48 | 0.97 | 1.0525 | 1.075 | 0.117 | 2.423 |
|  |  |  | 48 | 1.09 | 1.0525 | 46.334 | 4.282 | 2.423 |
|  |  |  | 51 | 1.24 | 1.0425 | 2.651 | 0.222 | 1.487 |
|  |  |  | 51 | 1.13 | 1.0525 | 7.023 | 0.650 | 2.423 |
|  |  |  | 51 | 1.08 | 1.0725 | 42.862 | 4.083 | 4.242 |
|  |  |  | 53 | 1.41 | 1.0525 | 2.029 | 0.151 | 2.423 |
|  |  |  | 53 | 1.52 | 1.0475 | 10.398 | 0.711 | 1.957 |
|  |  |  | 61 | 2.11 | 1.0525 | 0.156 | 0.008 | 2.423 |
|  |  |  | 61 | 2.07 | 1.0475 | 1.229 | 0.062 | 1.957 |
|  |  |  | 79 | 4.81 | 1.0438 | 0 | 0 | 1.605 |
|  |  |  | 99 | 8.92 | 1.0438 | 0 | 0 | 1.605 |
|  |  |  | 134 | 27.31 | 1.0285 | 0 | 0 | 0.146 |
| II | Melamphaeidae | *Melamphaes lugubris* | 22 | 0.18 | 1.0625 | 2.439 | 1.419 | 3.341 |
|  |  |  | 26 | 0.35 | 1.0675 | 0 | 0 | 3.794 |
|  |  |  | 26 | 0.35 | 1.0525 | 11.476 | 3.336 | 2.423 |
|  |  |  | 32 | 0.72 | 1.0675 | 8.230 | 1.206 | 3.794 |
|  |  |  | 39 | 1.13 | 1.0650 | P | - | 3.568 |
|  |  |  | 43 | 1.86 | 1.0625 | 62.705 | 3.458 | 3.341 |

**Table S3**. (continued)

| **Group** | **Family** | **Species** | ***L*S (mm)** | ***W*W (g)** | ****f** | **Gas vol. (mm3)** | **Gas vol.**  **(% total)** | ***V*G**  **(% total)** |
| --- | --- | --- | --- | --- | --- | --- | --- | --- |
| II | Melamphaeidae | *Melamphaes lugubris* | 50 | 2.84 | 1.0425 | 30.815 | 1.118 | 1.487 |
|  |  |  | 75 | 13.30 | 1.0285 | 0 | 0 | 0.146 |
|  |  |  | 79 | 14.65 | 1.0285 | 0 | 0 | 0.146 |
| III | Scopelarchidae | *Scopelarchus stephensi* | 25 | 0.17 | 1.0700 | 0 | 0 | 4.019 |
|  |  |  | 38 | 0.50 | 1.0825 | 0 | 0 | 5.127 |
|  |  |  | 55 | 1.87 | 1.0800 | 0 | 0 | 4.907 |
| III | Notosudidae | *Scopelosaurus harryi* | 43 | 0.16 | 1.0625 | 0 | 0 | 3.341 |
|  |  |  | 48 | 0.26 | 1.0600 | 0 | 0 | 3.113 |
|  |  |  | 48 | 0.28 | 1.0600 | 0 | 0 | 3.113 |
|  |  |  | 50 | 0.28 | 1.0575 | 0 | 0 | 2.884 |
|  |  |  | 52 | 0.34 | 1.0625 | 0 | 0 | 3.341 |
| III | Paralepididae | *Arctozenus risso* | 35 | 0.05 | 1.0800 | 0 | 0 | 4.907 |
|  |  |  | 40 | 0.11 | 1.0675 | 0 | 0 | 3.794 |
|  |  |  | 53 | 0.22 | 1.0650 | 0 | 0 | 3.568 |
|  |  |  | 55 | 0.23 | 1.0625 | 0 | 0 | 3.341 |
|  |  |  | 56 | 0.27 | 1.0625 | 0 | 0 | 3.341 |
|  |  |  | 124 | 2.32 | 1.0550 | 0 | 0 | 2.654 |
| III | Stomiidae | *Chauliodus macouni* | 30 | 0.10 | 1.0550 | 0 | 0 | 2.654 |
|  |  |  | 34 | 0.10 | 1.0475 | 0 | 0 | 1.957 |
|  |  |  | 38 | 0.13 | 1.0450 | 0 | 0 | 1.722 |
|  |  |  | 83 | 1.79 | 1.0525 | 0 | 0 | 2.423 |
|  |  |  | 113 | 4.07 | 1.0525 | 0 | 0 | 2.423 |
|  |  |  | 122 | 6.41 | 1.0475 | 0 | 0 | 1.957 |
| III | Stomiidae | *Aristostomias xenostoma* | 33 | 0.18 | 1.0500 | 0 | 0 | 2.190 |
|  |  |  | 38 | 0.23 | 1.0500 | 0 | 0 | 2.190 |
|  |  |  | 38 | 0.22 | 1.0475 | 0 | 0 | 1.957 |
|  |  |  | 39 | 0.28 | 1.0500 | 0 | 0 | 2.190 |
|  |  |  | 41 | 0.30 | 1.0500 | 0 | 0 | 2.190 |
| III | Bathylagidae | *Leuroglossus stilbius* | 25 | 0.14 | 1.0525 | 0 | 0 | 2.423 |
|  |  |  | 26 | 0.16 | 1.0475 | 0 | 0 | 1.957 |
|  |  |  | 26 | 0.13 | 1.0400 | 0 | 0 | 1.250 |
|  |  |  | 26 | 0.13 | 1.0375 | 0 | 0 | 1.012 |
|  |  |  | 29 | 0.18 | 1.0500 | 0 | 0 | 2.190 |
|  |  |  | 29 | 0.19 | 1.0500 | 0 | 0 | 2.190 |
| III | Stomiidae | *Photonectes parvimanus* | 30 | 0.15 | 1.0450 | 0 | 0 | 1.722 |
|  |  |  | 32 | 0.16 | 1.0450 | 0 | 0 | 1.722 |
|  |  |  | 32 | 0.17 | 1.0425 | 0 | 0 | 1.487 |
|  |  |  | 33 | 0.20 | 1.0475 | 0 | 0 | 1.957 |
|  |  |  | 33 | 0.19 | 1.0475 | 0 | 0 | 1.957 |
|  |  |  | 67 | 1.37 | 1.0475 | 0 | 0 | 1.957 |
| III | Platytroctidae | *Holtbyrnia latifrons* | 20 | 0.06 | 1.0475 | 0 | 0 | 1.957 |
|  |  |  | 21 | 0.05 | 1.0525 | 0 | 0 | 2.423 |
|  |  |  | 22 | 0.05 | 1.0525 | 0 | 0 | 2.423 |
|  |  |  | 24 | 0.07 | 1.0525 | 0 | 0 | 2.423 |
|  |  |  | 32 | 0.25 | 1.0475 | 0 | 0 | 1.957 |
|  |  |  | 52 | 1.08 | 1.0475 | 0 | 0 | 1.957 |
| III | Platytroctidae | *Sagamichthys abei* | 27 | 0.14 | 1.0525 | 0 | 0 | 2.423 |
|  |  |  | 28 | 0.13 | 1.0475 | 0 | 0 | 1.957 |
|  |  |  | 28 | 0.14 | 1.0475 | 0 | 0 | 1.957 |
|  |  |  | 36 | 0.36 | 1.0525 | 0 | 0 | 2.423 |
|  |  |  | 67 | 3.00 | 1.0475 | 0 | 0 | 1.957 |

**Table S3**. (continued)

| **Group** | **Family** | **Species** | ***L*S (mm)** | ***W*W (g)** | ****f** | **Gas vol. (mm3)** | **Gas vol.**  **(% total)** | ***V*G**  **(% total)** |
| --- | --- | --- | --- | --- | --- | --- | --- | --- |
| III | Alepocephalidae | *Alepocephalus tenebrosus* | 27 | 0.10 | 1.0425 | 0 | 0 | 1.487 |
|  |  |  | 35 | 0.27 | 1.0475 | 0 | 0 | 1.957 |
|  |  |  | 47 | 1.03 | 1.0500 | 0 | 0 | 2.190 |
|  |  |  | 50 | 1.11 | 1.0425 | 0 | 0 | 1.487 |
| III | Stomiidae | *Bathophilus flemingi* | 34 | 0.31 | 1.0425 | 0 | 0 | 1.487 |
|  |  |  | 35 | 0.19 | 1.0475 | 0 | 0 | 1.957 |
|  |  |  | 42 | 0.32 | 1.0425 | 0 | 0 | 1.487 |
|  |  |  | 43 | 0.33 | 1.0475 | 0 | 0 | 1.957 |
|  |  |  | 43 | 0.41 | 1.0475 | 0 | 0 | 1.957 |
|  |  |  | 46 | 0.43 | 1.0475 | 0 | 0 | 1.957 |
| III | Gonostomatidae | *Cyclothone acclinidens* | 25 | 0.07 | 1.0525 | 0 | 0 | 2.423 |
|  |  |  | 25 | 0.07 | 1.0525 | 0 | 0 | 2.423 |
|  |  |  | 26 | 0.09 | 1.0500 | 0 | 0 | 2.190 |
|  |  |  | 28 | 0.10 | 1.0700 | 0 | 0 | 4.019 |
|  |  |  | 29 | 0.22 | 1.0775 | 0 | 0 | 4.687 |
|  |  |  | 29 | 0.31 | 1.0775 | 0 | 0 | 4.687 |
|  |  |  | 29 | 0.14 | 1.0475 | 0 | 0 | 1.957 |
|  |  |  | 29 | 0.11 | 1.0500 | 0 | 0 | 2.190 |
|  |  |  | 30 | 0.14 | 1.0575 | 0 | 0 | 2.884 |
|  |  |  | 31 | 0.17 | 1.0475 | 0 | 0 | 1.957 |
|  |  |  | 31 | 0.13 | 1.0625 | 0 | 0 | 3.341 |
|  |  |  | 32 | 0.15 | 1.0525 | 0 | 0 | 2.423 |
|  |  |  | 33 | 0.14 | 1.0550 | 0 | 0 | 2.654 |
|  |  |  | 33 | 0.16 | 1.0575 | 0 | 0 | 2.884 |
|  |  |  | 33 | 0.16 | 1.0525 | 0 | 0 | 2.423 |
|  |  |  | 33 | 0.18 | 1.0475 | 0 | 0 | 1.957 |
|  |  |  | 35 | 0.15 | 1.0425 | 0 | 0 | 1.487 |
|  |  |  | 35 | 0.23 | 1.0475 | 0 | 0 | 1.957 |
|  |  |  | 37 | 0.27 | 1.0475 | 0 | 0 | 1.957 |
|  |  |  | 40 | 0.31 | 1.0475 | 0 | 0 | 1.957 |
|  |  |  | 41 | 0.19 | 1.0475 | 0 | 0 | 1.957 |
|  |  |  | 42 | 0.46 | 1.0475 | 0 | 0 | 1.957 |
|  |  |  | 43 | 0.16 | 1.0475 | 0 | 0 | 1.957 |
|  |  |  | 44 | 0.40 | 1.0425 | 0 | 0 | 1.487 |
|  |  |  | 45 | 0.47 | 1.0425 | 0 | 0 | 1.487 |
|  |  |  | 46 | 0.56 | 1.0475 | 0 | 0 | 1.957 |
|  |  |  | 46 | 0.48 | 1.0475 | 0 | 0 | 1.957 |
|  |  |  | 46 | 0.47 | 1.0425 | 0 | 0 | 1.487 |
|  |  |  | 47 | 0.39 | 1.0500 | 0 | 0 | 2.190 |
|  |  |  | 47 | 0.49 | 1.0450 | 0 | 0 | 1.722 |
|  |  |  | 48 | 0.48 | 1.0475 | 0 | 0 | 1.957 |
|  |  |  | 49 | 0.51 | 1.0525 | 0 | 0 | 2.423 |
|  |  |  | 50 | 0.70 | 1.0450 | 0 | 0 | 1.722 |
|  |  |  | 50 | 0.52 | 1.0450 | 0 | 0 | 1.722 |
|  |  |  | 51 | 0.60 | 1.0425 | 0 | 0 | 1.487 |
|  |  |  | 51 | 0.66 | 1.0425 | 0 | 0 | 1.487 |
|  |  |  | 51 | 0.66 | 1.0425 | 0 | 0 | 1.487 |
|  |  |  | 51 | 0.80 | 1.0375 | 0 | 0 | 1.012 |
|  |  |  | 51 | 0.63 | 1.0475 | 0 | 0 | 1.957 |
|  |  |  | 52 | 0.75 | 1.0425 | 0 | 0 | 1.487 |
|  |  |  | 52 | 0.61 | 1.0425 | 0 | 0 | 1.487 |

**Table S3**. (continued)

| **Group** | **Family** | **Species** | ***L*S (mm)** | ***W*W (g)** | ****f** | **Gas vol. (mm3)** | **Gas vol.**  **(% total)** | ***V*G**  **(% total)** |
| --- | --- | --- | --- | --- | --- | --- | --- | --- |
| III | Gonostomatidae | *Cyclothone acclinidens* | 55 | 0.88 | 1.0450 | 0 | 0 | 1.722 |
|  |  |  | 58 | 0.35 | 1.0375 | 0 | 0 | 1.012 |
|  |  |  | 61 | 1.07 | 1.0375 | 0 | 0 | 1.012 |
| III | Gonostomatidae | *Cyclothone pallida* | 30 | 0.12 | 1.0400 | 0 | 0 | 1.250 |
|  |  |  | 40 | 0.24 | 1.0575 | 0 | 0 | 2.884 |
|  |  |  | 54 | 0.71 | 1.0400 | 0 | 0 | 1.250 |
|  |  |  | 56 | 0.82 | 1.0400 | 0 | 0 | 1.250 |
|  |  |  | 62 | 1.04 | 1.0425 | 0 | 0 | 1.487 |
|  |  |  | 68 | 1.37 | 1.0475 | 0 | 0 | 1.957 |
| III | Bathylagidae | *Bathylagoides wesethi* | 24 | 0.13 | 1.0425 | 0 | 0 | 1.487 |
|  |  |  | 25 | 0.10 | 1.0525 | 0 | 0 | 2.423 |
|  |  |  | 25 | 0.13 | 1.0500 | 0 | 0 | 2.190 |
|  |  |  | 27 | 0.15 | 1.0575 | 0 | 0 | 2.884 |
|  |  |  | 28 | 0.16 | 1.0575 | 0 | 0 | 2.884 |
|  |  |  | 28 | 0.19 | 1.0475 | 0 | 0 | 1.957 |
|  |  |  | 28 | 0.18 | 1.0475 | 0 | 0 | 1.957 |
|  |  |  | 30 | 0.28 | 1.0500 | 0 | 0 | 2.190 |
|  |  |  | 30 | 0.23 | 1.0525 | 0 | 0 | 2.423 |
|  |  |  | 30 | 0.14 | 1.0525 | 0 | 0 | 2.423 |
|  |  |  | 30 | 0.18 | 1.0450 | 0 | 0 | 1.722 |
|  |  |  | 30 | 0.21 | 1.0425 | 0 | 0 | 1.487 |
|  |  |  | 30 | 0.14 | 1.0600 | 0 | 0 | 3.113 |
|  |  |  | 31 | 0.27 | 1.0525 | 0 | 0 | 2.423 |
|  |  |  | 31 | 0.19 | 1.0525 | 0 | 0 | 2.423 |
|  |  |  | 32 | 0.31 | 1.0475 | 0 | 0 | 1.957 |
|  |  |  | 33 | 0.32 | 1.0575 | 0 | 0 | 2.884 |
|  |  |  | 33 | 0.30 | 1.0575 | 0 | 0 | 2.884 |
|  |  |  | 35 | 0.29 | 1.0575 | 0 | 0 | 2.884 |
|  |  |  | 36 | 0.40 | 1.0450 | 0 | 0 | 1.722 |
|  |  |  | 37 | 0.40 | 1.0525 | 0 | 0 | 2.423 |
|  |  |  | 37 | 0.36 | 1.0550 | 0 | 0 | 2.654 |
|  |  |  | 39 | 0.57 | 1.0325 | 0 | 0 | 0.533 |
|  |  |  | 41 | 0.66 | 1.0425 | 0 | 0 | 1.487 |
|  |  |  | 41 | 0.67 | 1.0425 | 0 | 0 | 1.487 |
|  |  |  | 41 | 0.65 | 1.0425 | 0 | 0 | 1.487 |
|  |  |  | 42 | 0.67 | 1.0525 | 0 | 0 | 2.423 |
|  |  |  | 42 | 0.64 | 1.0450 | 0 | 0 | 1.722 |
|  |  |  | 43 | 0.70 | 1.0575 | 0 | 0 | 2.884 |
|  |  |  | 44 | 0.84 | 1.0425 | 0 | 0 | 1.487 |
|  |  |  | 44 | 0.72 | 1.0475 | 0 | 0 | 1.957 |
|  |  |  | 45 | 0.78 | 1.0525 | 0 | 0 | 2.423 |
|  |  |  | 45 | 0.85 | 1.0425 | 0 | 0 | 1.487 |
|  |  |  | 47 | 0.94 | 1.0500 | 0 | 0 | 2.190 |
|  |  |  | 49 | 0.99 | 1.0450 | 0 | 0 | 1.722 |
|  |  |  | 49 | 1.00 | 1.0500 | 0 | 0 | 2.190 |
|  |  |  | 50 | 1.32 | 1.0450 | 0 | 0 | 1.722 |
|  |  |  | 51 | 1.27 | 1.0425 | 0 | 0 | 1.487 |
|  |  |  | 52 | 1.38 | 1.0375 | 0 | 0 | 1.012 |
|  |  |  | 53 | 1.44 | 1.0425 | 0 | 0 | 1.487 |
|  |  |  | 53 | 1.44 | 1.0425 | 0 | 0 | 1.487 |
|  |  |  | 55 | 1.61 | 1.0475 | 0 | 0 | 1.957 |

**Table S3**. (continued)

| **Group** | **Family** | **Species** | ***L*S (mm)** | ***W*W (g)** | ****f** | **Gas vol. (mm3)** | **Gas vol.**  **(% total)** | ***V*G**  **(% total)** |
| --- | --- | --- | --- | --- | --- | --- | --- | --- |
| III | Bathylagidae | *Bathylagoides wesethi* | 56 | 1.48 | 1.0425 | 0 | 0 | 1.487 |
|  |  |  | 57 | 1.67 | 1.0425 | 0 | 0 | 1.487 |
|  |  |  | 58 | 1.51 | 1.0450 | 0 | 0 | 1.722 |
|  |  |  | 60 | 1.77 | 1.0475 | 0 | 0 | 1.957 |
|  |  |  | 61 | 1.91 | 1.0450 | 0 | 0 | 1.722 |
|  |  |  | 62 | 1.92 | 1.0475 | 0 | 0 | 1.957 |
|  |  |  | 63 | 2.10 | 1.0425 | 0 | 0 | 1.487 |
|  |  |  | 63 | 2.21 | 1.0425 | 0 | 0 | 1.487 |
|  |  |  | 64 | 2.43 | 1.0425 | 0 | 0 | 1.487 |
|  |  |  | 66 | 2.46 | 1.0400 | 0 | 0 | 1.250 |
|  |  |  | 69 | 3.39 | 1.0425 | 0 | 0 | 1.487 |
|  |  |  | 70 | 3.45 | 1.0425 | 0 | 0 | 1.487 |
|  |  |  | 76 | 4.20 | 1.0375 | 0 | 0 | 1.012 |
| III | Stomiidae | *Tactostoma macropus* | 76 | 0.40 | 1.0475 | 0 | 0 | 1.957 |
|  |  |  | 215 | 13.14 | 1.0363 | 0 | 0 | 0.893 |
|  |  |  | 226 | 18.74 | 1.0413 | 0 | 0 | 1.369 |
|  |  |  | 254 | 30.13 | 1.0363 | 0 | 0 | 0.893 |
| III | Stomiidae | *Stomias atriventer* | 139 | 6.90 | 1.0400 | 0 | 0 | 1.250 |
|  |  |  | 153 | 9.40 | 1.0425 | 0 | 0 | 1.487 |
|  |  |  | 156 | 13.30 | 1.0400 | 0 | 0 | 1.250 |
|  |  |  | 187 | 20.54 | 1.0375 | 0 | 0 | 1.012 |
| III | Myctophidae | *Parvilux ingens* | 80 | 3.87 | 1.0475 | 0 | 0 | 1.957 |
|  |  |  | 91 | 5.78 | 1.0425 | 0 | 0 | 1.487 |
|  |  |  | 99 | 7.89 | 1.0438 | 0 | 0 | 1.605 |
|  |  |  | 120 | 15.66 | 1.0413 | 0 | 0 | 1.369 |
|  |  |  | 128 | 17.29 | 1.0425 | 0 | 0 | 1.487 |
|  |  |  | 160 | 44.14 | 1.0363 | 0 | 0 | 0.893 |
| III | Stomiidae | *Idiacanthus antrostomus* | 58 | 0.09 | 1.0625 | 0 | 0 | 3.341 |
|  |  |  | 66 | 0.15 | 1.0525 | 0 | 0 | 2.423 |
|  |  |  | 68 | 0.14 | 1.0525 | 0 | 0 | 2.423 |
|  |  |  | 71 | 0.16 | 1.0575 | 0 | 0 | 2.884 |
|  |  |  | 73 | 0.13 | 1.0525 | 0 | 0 | 2.423 |
|  |  |  | 73 | 0.16 | 1.0675 | 0 | 0 | 3.794 |
|  |  |  | 73 | 0.26 | 1.0475 | 0 | 0 | 1.957 |
|  |  |  | 75 | 0.18 | 1.0525 | 0 | 0 | 2.423 |
|  |  |  | 79 | 0.27 | 1.0525 | 0 | 0 | 2.423 |
|  |  |  | 91 | 0.34 | 1.0500 | 0 | 0 | 2.190 |
|  |  |  | 115 | 0.88 | 1.0438 | 0 | 0 | 1.605 |
|  |  |  | 143 | 2.87 | 1.0413 | 0 | 0 | 1.369 |
|  |  |  | 153 | 1.43 | 1.0438 | 0 | 0 | 1.605 |
|  |  |  | 153 | 1.89 | 1.0525 | 0 | 0 | 2.423 |
|  |  |  | 162 | 3.03 | 1.0363 | 0 | 0 | 0.893 |
|  |  |  | 163 | 2.14 | 1.0375 | 0 | 0 | 1.012 |
|  |  |  | 177 | 1.67 | 1.0438 | 0 | 0 | 1.605 |
|  |  |  | 178 | 2.40 | 1.0413 | 0 | 0 | 1.369 |
|  |  |  | 197 | 2.35 | 1.0438 | 0 | 0 | 1.605 |
|  |  |  | 329 | 15.99 | 1.0375 | 0 | 0 | 1.012 |
|  |  |  | 385 | 25.89 | 1.0338 | 0 | 0 | 0.653 |
| III | Bathylagidae | *Lipolagus ochotensis* | 25 | 0.10 | 1.0475 | 0 | 0 | 1.957 |
|  |  |  | 29 | 0.14 | 1.0525 | 0 | 0 | 2.423 |
|  |  |  | 31 | 0.26 | 1.0425 | 0 | 0 | 1.487 |

**Table S3**. (continued)

| **Group** | **Family** | **Species** | ***L*S (mm)** | ***W*W (g)** | ****f** | **Gas vol. (mm3)** | **Gas vol.**  **(% total)** | ***V*G**  **(% total)** |
| --- | --- | --- | --- | --- | --- | --- | --- | --- |
| III | Bathylagidae | *Lipolagus ochotensis* | 32 | 0.28 | 1.0500 | 0 | 0 | 2.190 |
|  |  |  | 36 | 0.42 | 1.0475 | 0 | 0 | 1.957 |
|  |  |  | 42 | 0.63 | 1.0475 | 0 | 0 | 1.957 |
|  |  |  | 45 | 0.82 | 1.0500 | 0 | 0 | 2.190 |
|  |  |  | 45 | 0.80 | 1.0475 | 0 | 0 | 1.957 |
|  |  |  | 45 | 0.78 | 1.0525 | 0 | 0 | 2.423 |
|  |  |  | 48 | 1.01 | 1.0475 | 0 | 0 | 1.957 |
|  |  |  | 74 | 3.40 | 1.0325 | 0 | 0 | 0.533 |
|  |  |  | 110 | 12.25 | 1.0338 | 0 | 0 | 0.653 |
| III | Myctophidae | *Lobianchia gemellarii* | 55 | 2.93 | 1.0450 | 0 | 0 | 1.722 |
|  |  |  | 57 | 3.25 | 1.0400 | 0 | 0 | 1.250 |
|  |  |  | 65 | 4.83 | 1.0350 | 0 | 0 | 0.773 |
| (epip.) | Carangidae | *Seriola lalandi* | 83 | 12.39 | 1.0775 | P | 0 | 4.687 |
| (epip.) | Scomberesocidae | *Cololabis saira* | 33 | 0.13 | 1.0875 | 0 | 0 | 5.563 |
|  |  |  | 157 | 15.35 | 1.0775 | P | - | 4.687 |
| - | Nemichthyidae | *Nemichthys scolopaceus* | 544 | 3.64 | 1.0675 | 0 | 0 | 3.794 |
| - | Platytroctidae | *Mirorictus taningi* | 47 | 0.83 | 1.0475 | 0 | 0 | 1.957 |
| - | Gonostomatidae | *Diplophos taenia* | 33 | 0.05 | 1.0750 | 2.614 | 0 | 4.465 |
|  |  |  | 40 | 0.08 | 1.0725 | 0.020 | 0 | 4.242 |
| - | Sternoptychidae | *Valenciennellus tripunctulatis* | 24 | 0.17 | 1.0775 | 0.156 | 0 | 4.687 |
|  |  |  | 28 | 0.19 | 1.0700 | R | 0 | 4.019 |
| - | Phosichthyidae | *Vinciguerria lucetia* | 18 | 0.06 | 1.0650 | 2.439 | 4.150 | 3.568 |
|  |  |  | 24 | 0.15 | 1.0700 | 0.156 | 0.111 | 4.019 |
| - | Stomiidae | *Aristostomias scintillans* | 43 | 0.36 | 1.0500 | 0 | 0 | 2.190 |
| - | Stomiidae | *Opostomias mitsuii* | 65 | 1.07 | 1.0475 | 0 | 0 | 1.957 |
| - | Stomiidae | *Eustomias* sp. | 64 | 0.37 | 1.0475 | 0 | 0 | 1.957 |
| - | Stomiidae | *Photonectes* sp. | 31 | 0.13 | 1.0475 | 0 | 0 | 1.957 |
|  |  |  | 40 | 0.24 | 1.0450 | 0 | 0 | 1.722 |
| - | Stomiidae | *Bathophilus kingi* | 76 | 1.93 | 1.0425 | 0 | 0 | 1.487 |
| - | Stomiidae | *Bathophilus pawneei* | 22 | 0.08 | 1.0525 | 0 | 0 | 2.423 |
| - | Stomiidae | *Astronesthes nigroides* | 28 | 0.23 | 1.0475 | 0 | 0 | 1.957 |
| - | Scopelarchidae | *Scopelarchus analis* | 36 | 0.30 | 1.0750 | 0 | 0 | 4.465 |
| - | Scopelarchidae | *Scopelarchus guentheri* | 34 | 0.14 | 1.0650 | 0 | 0 | 3.568 |
|  |  |  | 38 | 0.23 | 1.0700 | 0 | 0 | 4.019 |
| - | Paralepididae | *Lestidiops ringens* | 85 | 0.69 | 1.0700 | 0 | 0 | 4.019 |
|  |  |  | 90 | 0.96 | 1.0675 | 0 | 0 | 3.794 |
| - | Paralepididae | *Lestidiops pacificum* | 68 | 0.68 | 1.0500 | 0 | 0 | 2.190 |
| - | Myctophidae | *Diaphus phillipsi* | 43 | 1.42 | 1.0775 | 30.059 | 0 | 4.687 |
| - | Myctophidae | *Nannobrachium bristori* | 106 | 11.60 | 1.043 | 0 | 0 | 1.487 |
| - |  |  | 121 | 14.48 | 1.043 | 0 | 0 | 1.487 |
| - | Myctophidae | *Nannobrachium lineatum* | 57 | 1.12 | 1.0525 | P | 0 | 2.423 |
| - | Melamphaeidae | *Melamphaes polylepis* | 90 | 16.24 | 1.0250 | 0 | 0 | -0.195 |
| - | Melamphaeidae | *Melamphaes laeviceps* | 16 | 0.08 | 1.0625 | 0 | 0 | 3.341 |

**Table S4**. Swimbladder inflation, lipid content, and body specific gravity for species in this and previous studies. In the “Gas” column, ratios represent the fraction of animals containing gas in their swimbladder. High lipid levels are defined as >9% of wet weight or 40% of dry weight. Dense density refers to species which were identified as dense-bodied, but for which no measurements were reported. Brackets indicate data from this study. Numbered references are listed in the table footnote. Species are ordered as in Table S3, and omitted where no data are available.

| **Fish**  **group** | **Species** | **Gas** | **Lipid content** | **Density (g ml–1) or specific gravity** |
| --- | --- | --- | --- | --- |
| I | *T. crenularis* | 9/14 < 34 mm, 4/19 > 30 mm5; some22; 3/90 trawl, 66/128 surface24; 13/2513; 7/915; no gas7; increases with *L*S13,24; [12/20] | Low5,7,22,25; does not increase with *L*S5,22 | 1.086-1.0895;  1.074-1.08022;  1.055-1.08013;  [1.055-1.080] |
| I | *H. reinhardtii* | Gas3; [4/4] | Low7,34 | [1.063-1.078] |
| I | *N. resplendens* | Gas4,22,29; increases with *L*S29; [2/5] | Low19,22,34; high31 | 1.05022;  [1.070-1.078] |
| I | *D. atlanticus* | Gas4,20,29; increases with *L*S29; [24/25] | - | [1.055-1.080] |
| I | *M. nitidulum* | Gas4,10,22,33; increases with *L*S4,10,33; [15/17] | Low17,22,19,34 | 1.05022;  [1.060-1.078] |
| I | *E. risso* | Gas18,20; increases with *L*S18; [2/3] | - | [1.070-1.073] |
| I | *H. proximum* | - | Low32 | [1.065-1.075] |
| I | *P. crockeri* | Gas5,7,15,22,28;44/5113; [19/28] | Low5,22 | Dense22;  1.065-1.08013;  [1.058-1.083] |
| I | *L. urophaos* | Gas4,29; smaller fish only22; increases with *L*S4,29; decr. with *L*S22; [10/12] | High, increases with *L*S22 | 1.030-1.04422; [1.050-1.078] |
| I | *B. longipes* | Gas22; [4/4] | Low8,22 | Dense22;  [1.068-1.073] |
| I | *C. warmingii* | Gas, increases with *L*S4,29,38; [18/18] | Low8,9,32; high1,30,31 | 1.03638;  [1.050-1.073] |
| I | *V. nimbaria* | Gas20; [9/9] | Low8 | [1.060-1.070] |
| I | *V. poweriae* | Gas, increases with *L*S4,18,29 | - | [1.060-1.078] |
| I | *D. fulgens* | [7/7] | Low17 | [1.068-1.075] |
| I | *L. tenuiformis* | [10/13] | Low8 | [1.060-1.073] |
| I | *M. microstoma* | Gas20; [5/6] | - | [1.058-1.070] |
| I | *D. oculatus* | Gas23; [23/23] | Low8,23,26 | [1.058-1.075] |
| I | *S. californiensis* | Gas3,7,15; dipnet only22; no gas36; 7/90 trawl, 267/289 surface, increases with *L*S24; [15/20] | Low25; high30,31,32; seasonally high, increases with *L*S22 | 1.044-1.06022; [1.053-1.080] |
| I | *C. taylori* | Gas27 | - | [1.060-1.068] |
| I | *T. bathyphilus* | Gas4,22,29; increases with *L*S4,29; [3/3] | Low8,22,34 | Dense22;  [1.058-1.063] |
| I | *A. lychnus* | Gas6,7,16 | Low7 | [1.063-1.068] |
| I | *A. sladeni* | Gas6,7,20,23,28; increases with *L*S28; [26/26] | Low1,7,19,23 | [1.043-1.073] |
| I | *A. hemigymnus* | Gas4,18,20,29; increases with *L*S4,18,29; [17/17] | Low34 | 1.05029;  [1.058-1.073] |
| I | *A. affinis* | Gas6,7,16,23; [17/17] | Low1,7,23 | [1.040-1.068] |
| I | *C. pseudopallida* | Gas21; [12/12] | Low8,17,26 | [1.050-1.060] |
| I | *M. simus* | Gas11; [4/5] | '- | [1.055-1.073] |
| I | *S. obscura* | Gas7,16; [7/7] | Low7 | [1.053-1.058] |
| I | *S. diaphana* | Gas4,20,29,33; incr. with *L*S4,29,33; [6/6] | Low1,8,17,19,34 | [1.049-1.058] |
| I | *C. signata* | Gas21,23; [35/36] | Low1,23,26 | [1.048-1.078] |

**Table S4**. (continued)

| **Fish**  **group** | **Species** | **Gas** | **Lipid content** | **Density (g ml–1) or specific gravity** |
| --- | --- | --- | --- | --- |
| I | *S. pseudobscura* | - | Low34 | [1.048-1.058] |
| I | *D. theta* | 0/66; 61/10913; 33/3315; 12/11422; 11/13 17-24 mm, 9/39 29-70 mm5; 176/17636; some2; no gas7; increases with *LS*13,22; decreases with *L*S36; [20/32] | High5,7,25,32; increases with *L*S5; seasonally high22; low30,31 | 1.025-1.04513; 1.025-1.0625; [1.038-1.068] |
| I | *T. nigrescens* | [4/4] | Low8 | [1.043-1.070] |
| I | *S. opisthopterus* | Gas4,16,29; increases with *L*S4,29; [3/3] | - | [1.038-1.053] |
| I | *N. valdiviae* | Gas4,34; [5/8] | Low8; High34 | [1.038-1.058] |
| I | *M. suborbitalis* | Gas11; [3/3] | - | [1.040-1.078] |
| I | *I. irregularis* | Gas23; [3/3] | High23 | [1.038-1.050] |
| II | *M. parvus* | No gas11; [3/4] | - | [1.055-1.078] |
| II | *C. atraria* | - | Low17 | [1.040-1.058] |
| II | *C. townsendi* | 1/2322; [17/43, no gas > 39 mm] | High1,22; increases with *L*S22 | 1.041-1.05722; [1.038-1.083] |
| II | *S. mizolepis* | Regressed swimbladder12,20; no gas7,8,23; [4/19 , no gas > 48 mm] | Low7,8,23,34 | [1.038-1.058] |
| II | *P. crassiceps* | No gas7,8; [13/14] | Low1,7,23 | [1.043-1.068] |
| II | *N. ritteri* | No gas7,22,25; no gas > 23 mm24; no gas > 50 mm5; [19/56, no gas > 45 mm] | High1,5,7,22,25; increases with *L*S22 | 1.034-1.05122; 1.023-1.0485; [1.029-1.058] |
| II | *T. mexicanus* | No gas7,22; no gas > 49mm6;gas > 33 mm28; [18/52, no gas > 34 mm] | High7,22,25; increases with *L*S22 | 1.029-1.0626; 1.025-1.03322; [1.029-1.055] |
| II | *S. leucopsarus* | No gas7,37; no gas > 57 mm6; no gas > 35 mm15; no gas > 39 mm5; some2; decreasing fraction up to 85 mm13; [22/57, no gas > 42 mm] | High5,7,25,30,31,32; increases with *L*S5 | 1.015-1.02513; 1.025-1.0485; 1.027-1.04437; [1.027-1.058] |
| II | *N. regale* | No gas7,22; no gas > 61 mm24; no gas > 49 mm5; [14/18, no gas > 61 mm] | Low1,5,7,22; high30,31,32 | 1.02122;  1.040-1.0415; [1.029-1.073] |
| II | *M. lugubris* | Gas7; no gas11; [6/9, no gas > 50 mm] | - | [1.029-1.068] |

**Table S4**. (continued)

| **Fish**  **group** | **Species** | **Gas** | **Lipid content** | **Density (g ml–1) or specific gravity** |
| --- | --- | --- | --- | --- |
| III | *S. stephensi* | No gas14 | - | [1.070-1.083] |
| III | *S. harryi* | No gas14 | Low23 | [1.058-1.063] |
| III | *A. risso* | No gas14 | - | [1.055-1.080] |
| III | *C. macouni* | No gas7,23,35 | Low23; high1 | [1.045-1.055] |
| III | *L. stilbius* | No gas7,23 | Low7,23 | [1.038-1.053] |
| III | *S. abei* | No gas7,23 | Low7,23 | [1.048-1.053] |
| III | *C. acclinidens* | No gas7,20 | Low1,7,26 | [1.038-1.078] |
| III | *C. pallida* | - | Low8,17,26,34 | [1.040-1.058] |
| III | *B. wesethi* | No gas7,23 | Low7,23 | [1.033-1.060] |
| III | *T. macropus* | No gas35 | - | [1.036-1.048] |
| III | *S. atriventer* | No gas7,23 | Low23; high7 | [1.038-1.043] |
| III | *P. ingens* | No gas7,22; [0/6] | Low22 | 1.02122;  [1.036-1.048] |
| III | *I. antrostomus* | No gas7,23 | Low1,7,23 | [1.034-1.068] |
| III | *L. ochotensis* | No gas23 | High23 | [1.033-1.053] |
| III | *L. gemellarii* | Gas3,4,29; [no gas 55-65 mm] | Low3,34; high8 | [1.035-1.045] |

1. (Bailey and Robison, 1986); 2. (Barham, 1957); 3. (Bone, 1973); 4. (Brooks, 1976); 5. (Butler and Pearcy, 1972); 6. (Capen, 1967); 7. (Childress and Nygaard, 1973); 8. (Childre*ss et a*l., 1990); 9. (Culkin and Morris, 1970); 10. (Dunlap, 1971); 11. (Ebeling, 1962); 12.(Ebeling and Weed, 1963); 13. (Johnson, 1979); 14. (Johnson, 1982); 15. (Kali*sh et a*l., 1986); 16. (Kanwisher and Ebeling, 1957); 17. (Kayama and Ikeda, 1975); 18. (Kleckner and Gibbs, 1972); 19. (Lee and Hirota, 1973); 20. (Marshall, 1960); 21. (Marshall, 1980); 22. (Neighbors and Nafpaktitis, 1982); 23. (Neighbors, 1988); 24. (Neighbors, 1992); 25. (Nevenz*el et a*l., 1969); 26. (Nevenzel and Menon, 1980); 27. (Niels*en et a*l., 1999); 28. (Pieper and Bargo, 1980); 29. (Saenger, 1989); 30. (Saito and Murata, 1996); 31. (Saito and Murata, 1998); 32. (S*eo et a*l., 1996); 33. (Shearer, 1971); 34. (Stickney and Torres, 1989); 35. (Yanc*ey et a*l., 1989); 36. (Yasu*ma et a*l., 2003); 37. (Yasu*ma et a*l., 2006); 38. (Yasu*ma et a*l., 2010)

**References**

Bailey, T. G., and Robison, B. H. 1986. Food availability as a selective factor on the chemical compositions of midwater fishes in the eastern North Pacific. Marine Biology, 91: 131–141.

Barham, E. G. 1957. The ecology of sonic scattering layers in the Monterey Bay area. Hopkins Marine Station of Stanford University, Pacific Grove. Technical Report 1: 1–182.

Bone, Q. 1973. A note on the buoyancy of some lantern-fishes (Myctophoidei). Journal of the Marine Biological Association of the United Kingdom, 53: 619–633.

Brooks, A. L. 1976. Swimbladder allometry of selected midwater fish species. National Technical Information Service, Springfield. USDOC, NUSC Technical Report 4983: 1–43.

Butler, J. L., and Pearcy, W. G. 1972. Swimbladder morphology and specific gravity of myctophids off Oregon. Journal of the Fisheries Research Board of Canada, 29: 1145–1150.

Capen, R. L. 1967. Swimbladder morphology of some mesopelagic fishes in relation to sound scattering. US Navy Electronics Laboratory San Diego Research Report 1447: 1–31.

Childress, J. J., and Nygaard, M. H. 1973. Chemical composition of midwater fishes as a function of depth of occurrence off southern California. Deep-Sea Research, 20: 1093–1109.

Childress, J. J., Price, M. H., Favuzzi, J., and Cowles, D. 1990. Chemical composition of midwater fishes as a function of depth of occurrence off the Hawaiian Islands: food availability as a selective factor? Marine Biology, 105: 235–246.

Culkin, F., and Morris, R. J. 1970. Fatty acids of some marine teleosts. Journal of Fish Biology, 2: 107–112.

Dunlap, C. R. 1971. A reconnaissance of the deep scattering layers in the eastern tropical Pacific and the Gulf of California. *In* Proceedings of an International Symposium on Biological Sound Scattering in the Ocean, pp. 395–408. Ed. by G. B. Farquhar. US Government Printing Office, Washington DC.

Ebeling, A. W. 1962. Melamphaidae I. Systematics and zoogeography of the species in the bathypelagic fish genus *Melamphaes* Gunther. Dana Report, 58: 1–164.

Ebeling, A. W., and Weed, W. H. 1963. Melamphaidae III. Systematics and distribution of the species in the bathypelagic fish genus *Scopelogadus* Vaillant. Dana Report, 60: 1–58.

Isaacs, J. D., and Kidd, L. W. 1953. Isaacs–Kidd midwater trawl final report. Scripps Institution of Oceanography Oceanographic Equipment Report, 1: 1–21.

Johnson, R. K. 1979. Gas bubble sizes for selected myctophids. Oregon State University School of Oceanography Reference 79-6: 1–18..

Johnson, R. K. 1982. Fishes of the families Evermannellidae and Scopelarchidae: systematics, morphology, interrelationships, and zoogeography. Fieldiana Zoology, N.S. 12: 1–252.

Kalish, J. M., Greenlaw, C. F., Pearcy, W. G., and Holliday, D. V. 1986. The biological and acoustical structure of sound scattering layers off Oregon. Deep-Sea Research, 33: 631–653.

Kanwisher, J., and Ebeling, A. 1957. Composition of the swim-bladder gas in bathypelagic fishes. Deep-Sea Research, 4: 211–217.

Kayama, M., and Ikeda, Y. 1975. Studies on the lipids of micronektonic fishes caught in Sagami and Suruga Bays, with special reference to their wax esters. Journal of Japan Oil Chemists' Society, 24: 435–440.

Kleckner, R. C., and Gibbs, R. H. 1972. Swimbladder structure of Mediterranean midwater fishes and a method of comparing swimbladder data with acoustic profiles. *In* Mediterranean Biological Studies Final Report I, pp. 230–281. Smithsonian Institution, Washington DC.

Lee, R. F., and Hirota, J. 1973. Wax esters in tropical zooplankton and nekton and geographical distribution of wax esters in marine copepods. Limnology and Oceanography, 18: 227–239.

Marshall, N. B. 1960. Swimbladder structure of deep-sea fishes in relation to their systematics and biology. Discovery Reports, 31: 122.

Marshall, N. B. 1980. Deep-Sea Biology: Developments and Perspectives*,* Garland STPM Press, New York.

Neighbors, M. A. 1988. Triacylglycerols and wax esters in the lipids of deep midwater teleost fishes of the Southern California Bight. Marine Biology, 98: 15–22.

Neighbors, M. A. 1992. Occurrence of inflated swimbladders in five species of lanternfishes (family Myctophidae) from waters off southern California. Marine Biology, 114: 355–363.

Neighbors, M. A., and Nafpaktitis, B. G. 1982. Lipid compositions, water contents, swimbladder morphologies and buoyancies of nineteen species of midwater fishes (18 Myctophids and 1 Neoscopelid). Marine Biology, 66: 207–215.

Nevenzel, J. C., and Menon, N. K. 1980. Lipids of midwater marine fish: family Gonostomatidae. Comparative Biochemistry and Physiology, 65B: 351–355.

Nevenzel, J. C., Rodegker, W., Robinson, J. S., and Kayama, M. 1969. Lipids of some lantern fishes (family Myctophidae). Comparative Biochemistry and Physiology, 31: 25–36.

Nielsen, J. G., Cohen, D. M., Markle, D. F., and Robins, C. R. 1999. Ophidiiform fishes of the world (Order Ophidiiformes). An annotated and illustrated catalogue of pearlfishes, cusk-eels, brotulas and other ophidiiform fishes known to date*,* FAO, Rome.

Oozeki, Y., Hu, F. X., Kubota, H., Sugisaki, H., and Kimura, R. 2004. Newly designed quantitative frame trawl for sampling larval and juvenile pelagic fish. Fisheries Science, 70: 223–232.

Pieper, R. E., and Bargo, B. G. 1980. Acoustic measurements of a migrating layer of the Mexican Lampfish, *Triphoturus mexicanus*, at 102 kilohertz. Fishery Bulletin US, 77: 935–942.

Saenger, R. A. 1989. Bivariate normal swimbladder size allometry models and allometric exponents for 38 mesopelagic swimbladdered fish species commonly found in the north Sargasso Sea. Canadian Journal of Fisheries and Aquatic Sciences, 46: 1986–2002.

Saito, H., and Murata, M. 1996. The high content of monoene fatty acids in the lipids of some midwater fishes: family Myctophidae. Lipids, 31: 757–763.

Saito, H., and Murata, M. 1998. Origin of the monoene fats in the lipid of midwater fishes: relationship between the lipids of myctophids and those of their prey. Marine Ecology Progress Series, 168: 21–33.

Seo, H. S., Endo, Y., Fujimoto, K., Watanabe, H., and Kawaguchi, K. 1996. Characterization of lipids in myctophid fish in the subarctic and tropical Pacific Ocean. Fisheries Science, 62: 447–453.

Shearer, L. W. 1971. Comparisons between surface-measured swimbladder volumes, depth of resonance, and 12-kHz echograms at the time of capture of sound-scattering fishes. *In* Proceedings of an International Symposium on Biological Sound Scattering in the Ocean, pp. 453-473. Ed. by G. B. Farquhar. US Government Printing Office, Washington DC.

Stickney, D. G., and Torres, J. J. 1989. Proximate composition and energy content of mesopelagic fishes from the eastern Gulf of Mexico. Marine Biology, 103: 13–24.

Yancey, P. H., Lawrence-Berrey, R., and Douglas, M. D. 1989. Adaptations in mesopelagic fishes. I. buoyant glycosaminoglycan layers in species without diel vertical migrations. Marine Biology, 103: 453–459.

Yasuma, H., Sawada, K., Olishima, T., Miyashita, K., and Aoki, I. 2003. Target strength of mesopelagic lanternfishes (family Myctophidae) based on swimbladder morphology. ICES Journal of Marine Science, 60: 584–591.

Yasuma, H., Sawada, K., Takao, Y., Miyashita, K., and Aoki, I. 2010. Swimbladder condition and target strength of myctophid fish in the temperate zone of the Northwest Pacific. ICES Journal of Marine Science, 67: 135–144.

Yasuma, H., Takao, Y., Sawada, K., Miyashita, K., and Aoki, I. 2006. Target strength of the lanternfish, *Stenobrachius leucopsarus* (family Myctophidae), a fish without an airbladder, measured in the Bering Sea. ICES Journal of Marine Science, 63: 683–692.
